# Supplementary material for: Synthesis and catalytic activity of heterobimetallic Au/M (M = RhIII, IrIII) complexes with ditopic mono- and triphosphane ligands
Source: Royal Society of Chemistry journal article supplement (doi:10.1039/d4dt01247j), 2024-01-01
Supplement: d4dt01247j1.pdf [file d4dt01247j1.pdf]

## Synthesis and catalytic activity of heterobimetallic Au/M (M = Rh<sup>III</sup>, Ir<sup>III</sup>) complexes with ditopic mono- and triphosphane ligands

Ivana Predarska,<sup>a</sup> Wieland Körber,<sup>a</sup> Peter Lönnecke,<sup>a</sup> Dmitri Gelman<sup>\*b</sup> and Evamarie Hey-Hawkins<sup>\*a</sup>

### Electronic Supplementary Information

#### Table of Contents

|                                            |    |
|--------------------------------------------|----|
| <b>Characterisation of complexes</b> ..... | 2  |
| Spectra of ligand <b>L1H</b> .....         | 2  |
| Spectra of complex <b>1</b> .....          | 4  |
| Spectra of complex <b>2</b> .....          | 6  |
| Spectra of complex <b>3</b> .....          | 9  |
| Spectra of complex <b>5</b> .....          | 12 |
| Spectra of complex <b>6</b> .....          | 14 |
| Spectra of complex <b>7</b> .....          | 17 |
| Spectra of complex <b>8</b> .....          | 19 |
| Spectra of complex <b>9</b> .....          | 22 |
| Spectra of complex <b>10</b> .....         | 24 |
| Spectra of complex <b>11</b> .....         | 28 |
| Crystallographic data .....                | 30 |

## Characterisation of complexes

### Spectra of ligand L1H

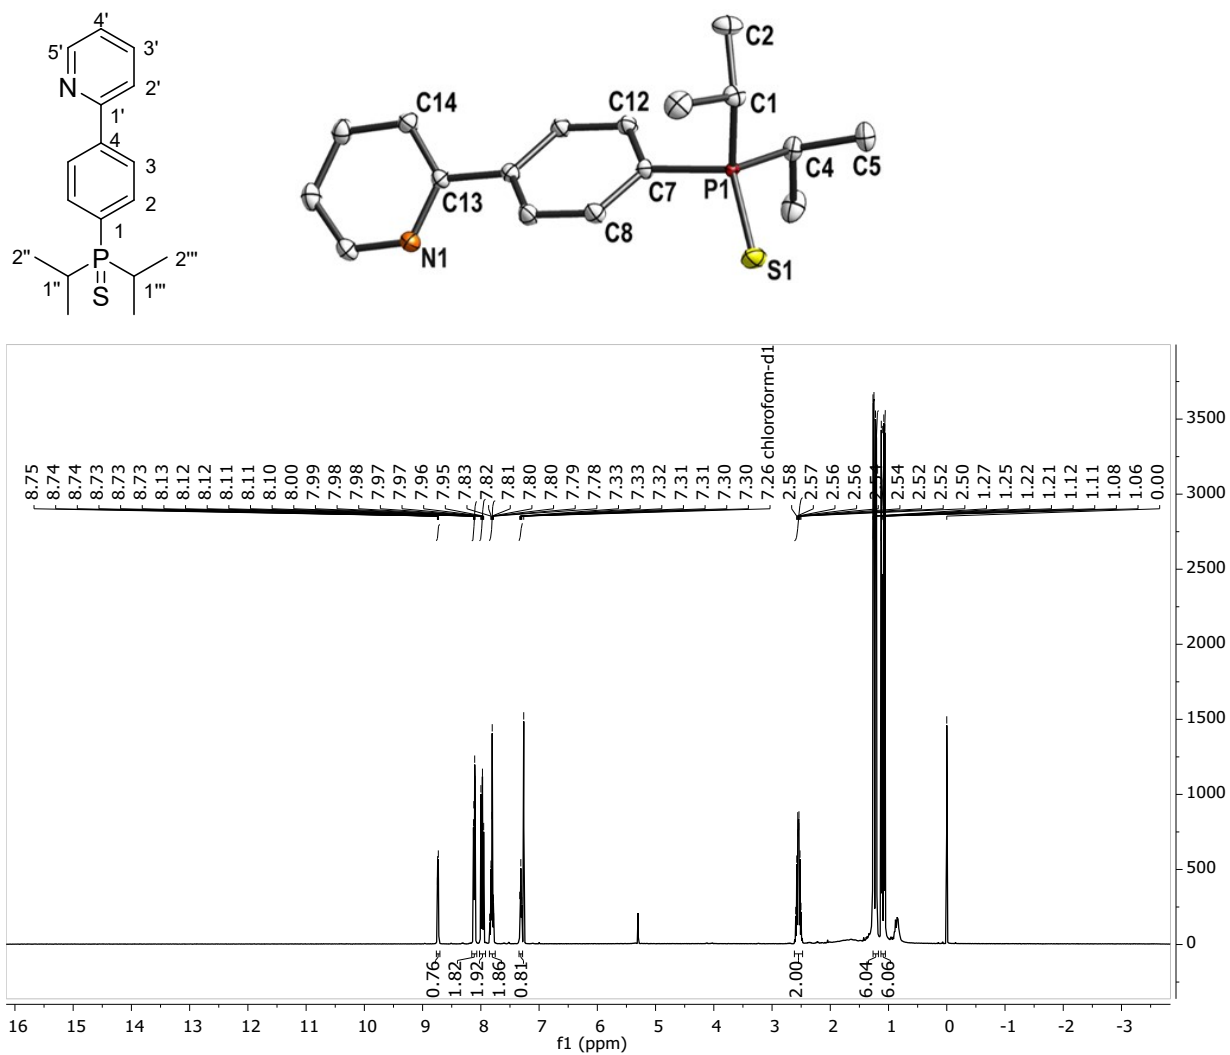

Figure S1. <sup>1</sup>H NMR spectrum of L1H in CDCl<sub>3</sub>.

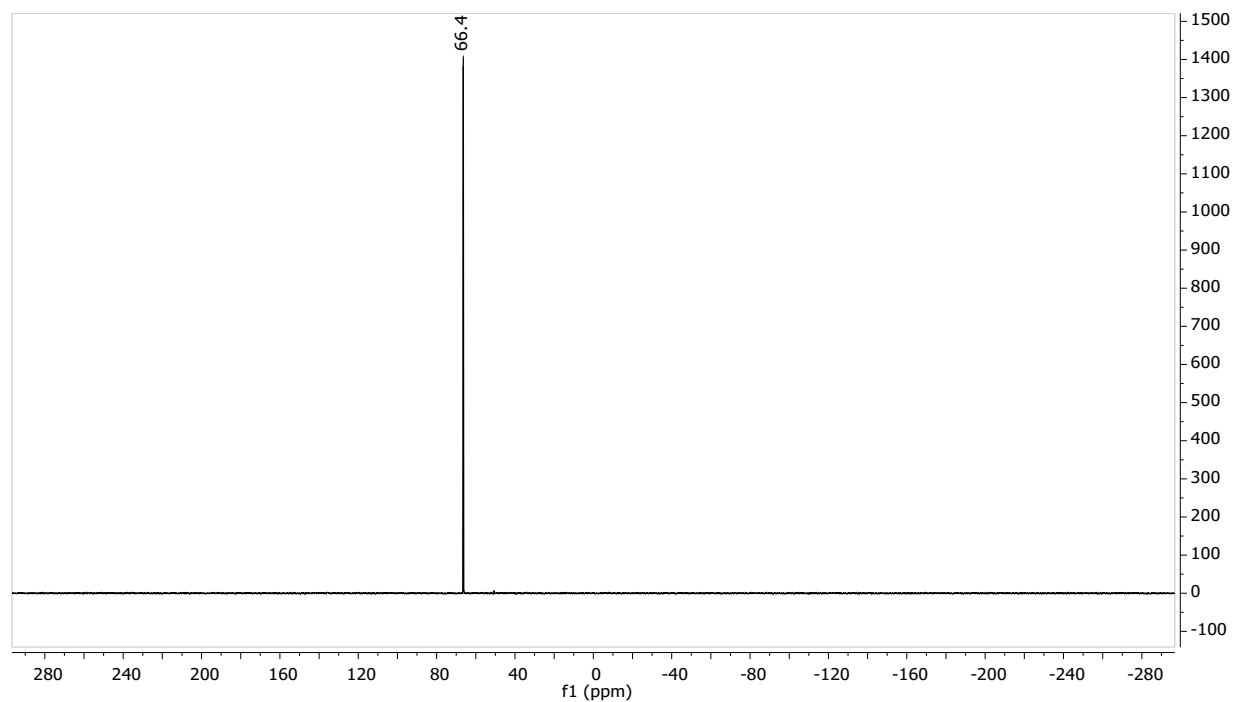

Figure S2. <sup>31</sup>P{<sup>1</sup>H} NMR spectrum of L1H in CDCl<sub>3</sub>.

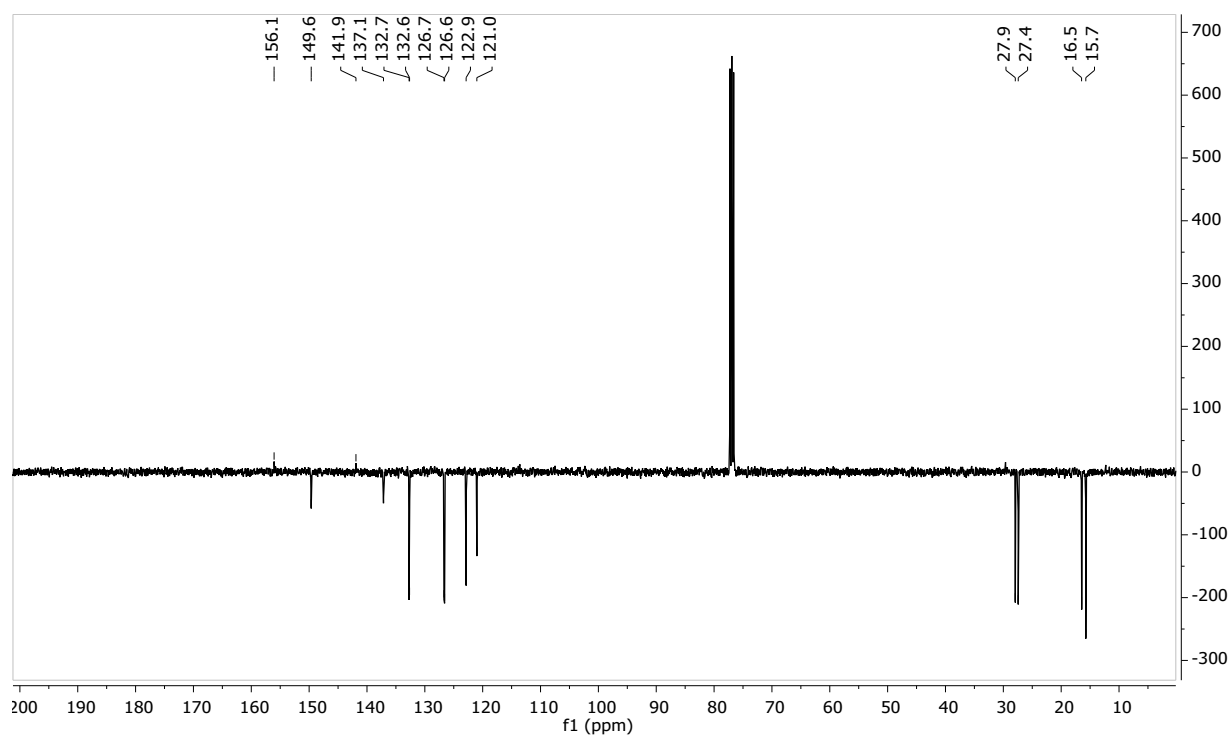

Figure S3. <sup>13</sup>C{<sup>1</sup>H} NMR spectrum of L1H in CDCl<sub>3</sub>.

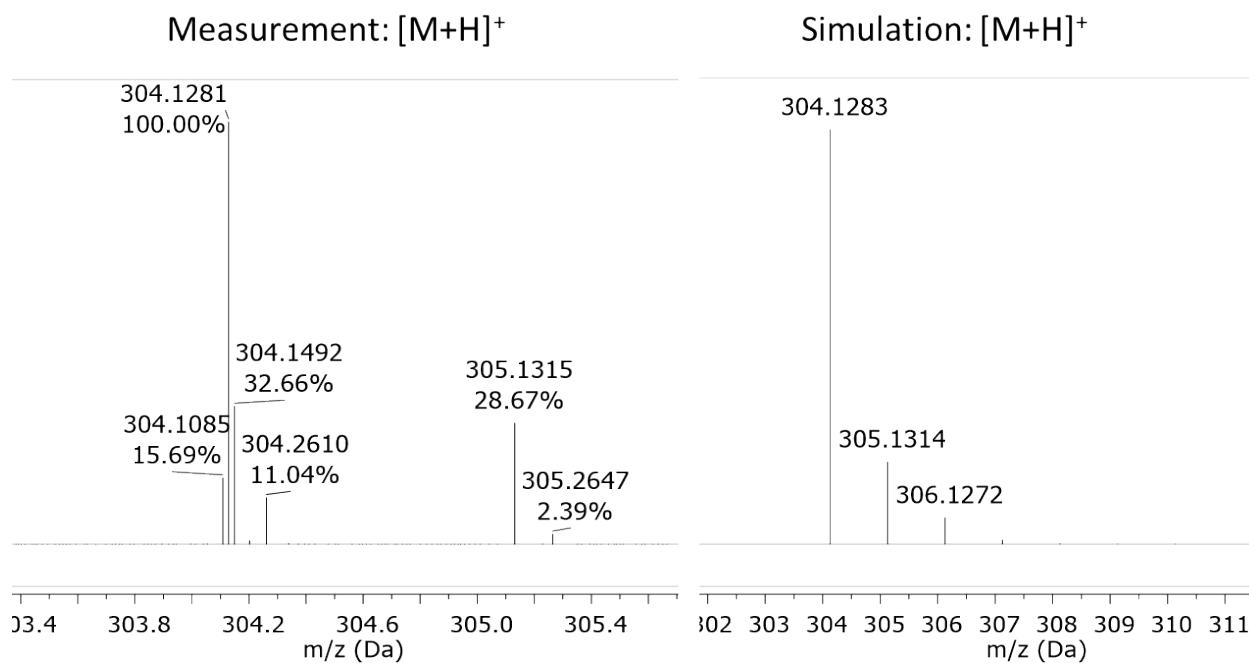

Figure S4. HR-ESI-MS (positive mode, CH<sub>3</sub>OH) of **L1**,  $m/z$   $[M+H]^+$ .

### Spectra of complex **1**

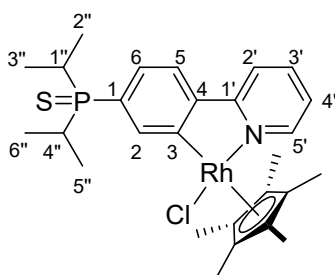

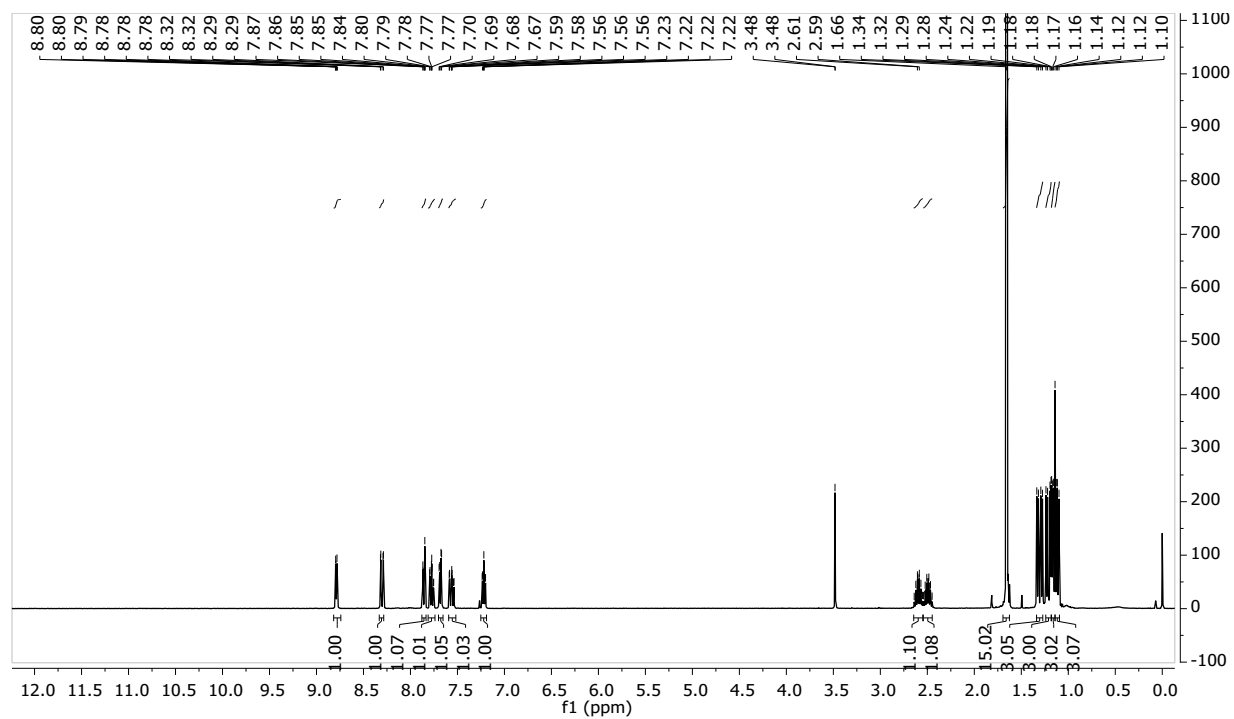

Figure S5.  $^1\text{H}$  NMR spectrum of **1** in  $\text{CDCl}_3$ .

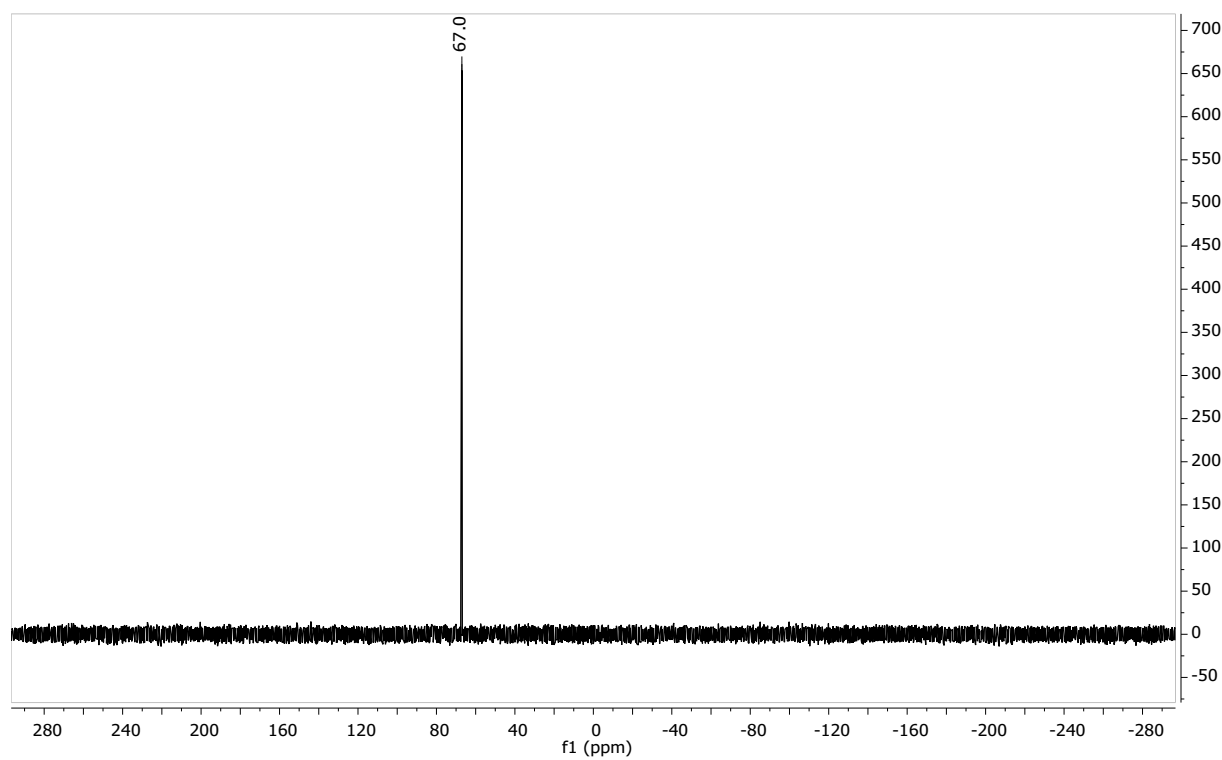

Figure S6.  $^{31}\text{P}\{^1\text{H}\}$  NMR spectrum of **1** in  $\text{CDCl}_3$ .

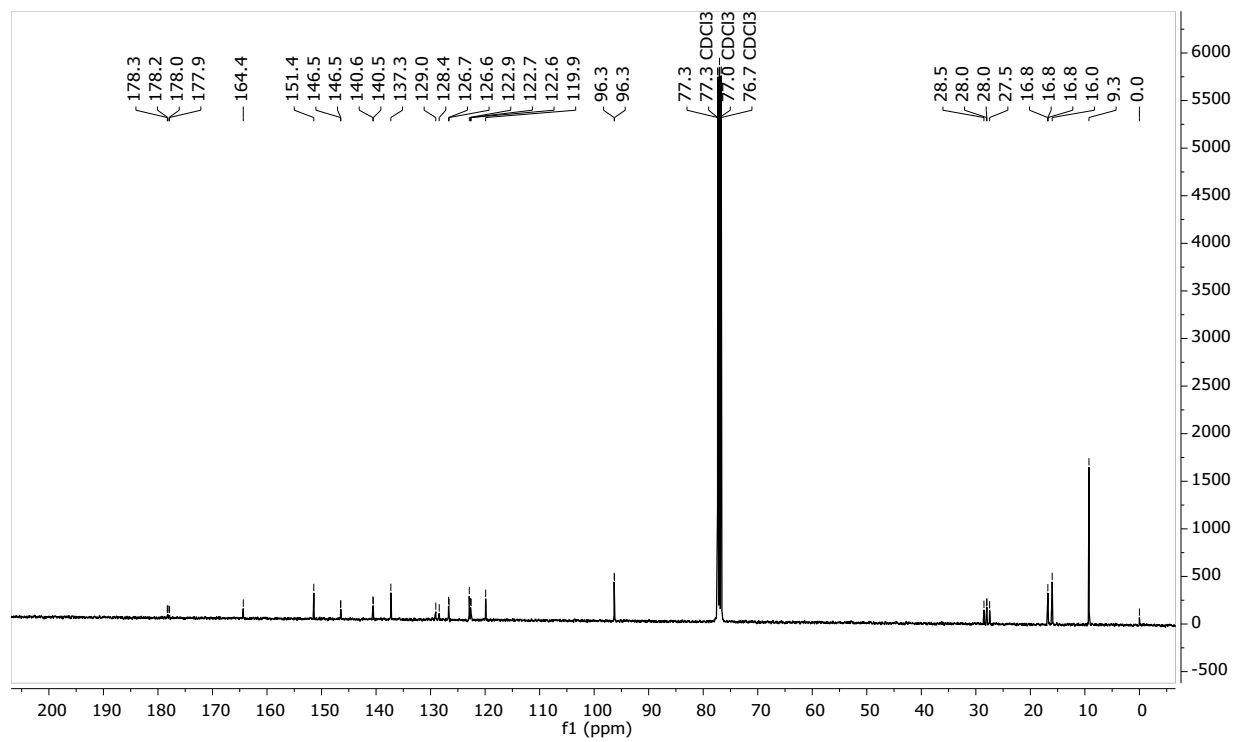

Figure S7.  $^{13}\text{C}\{^1\text{H}\}$  NMR spectrum of **1** in  $\text{CDCl}_3$ .

## Spectra of complex **2**

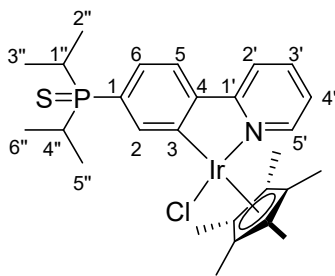

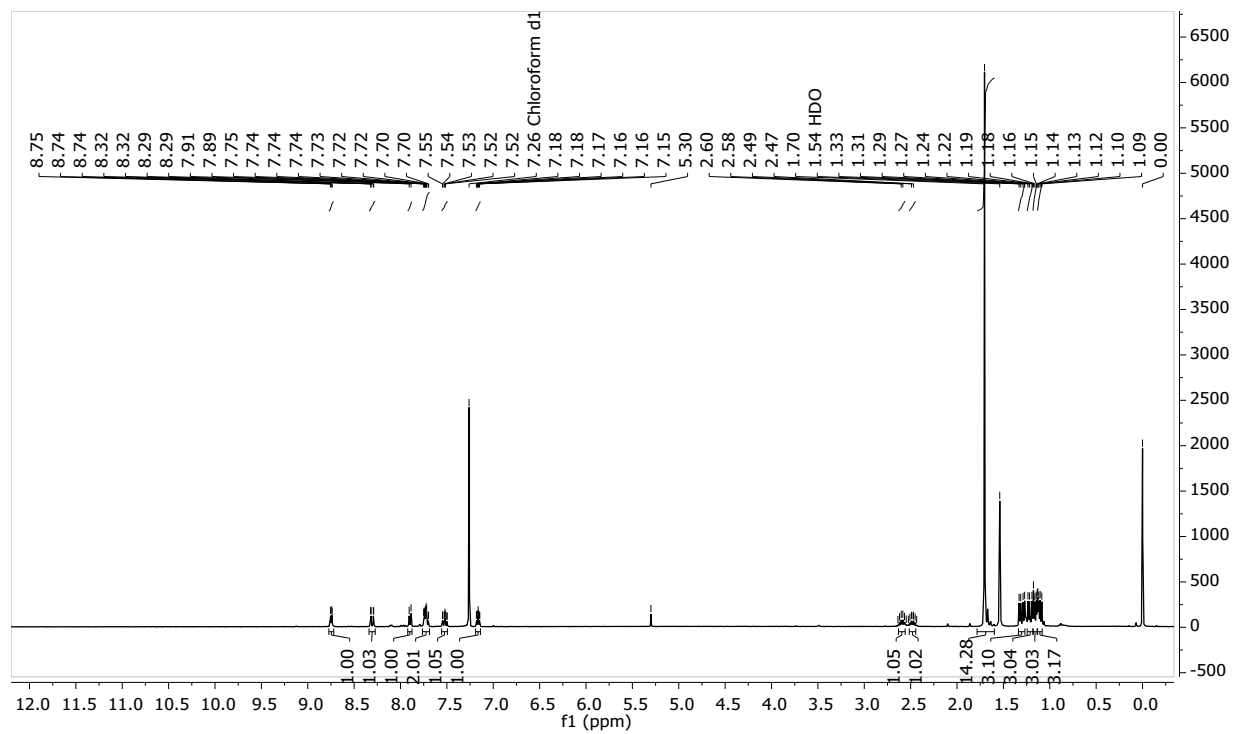

Figure S8.  $^1\text{H}$  NMR spectrum of **2** in  $\text{CDCl}_3$ .

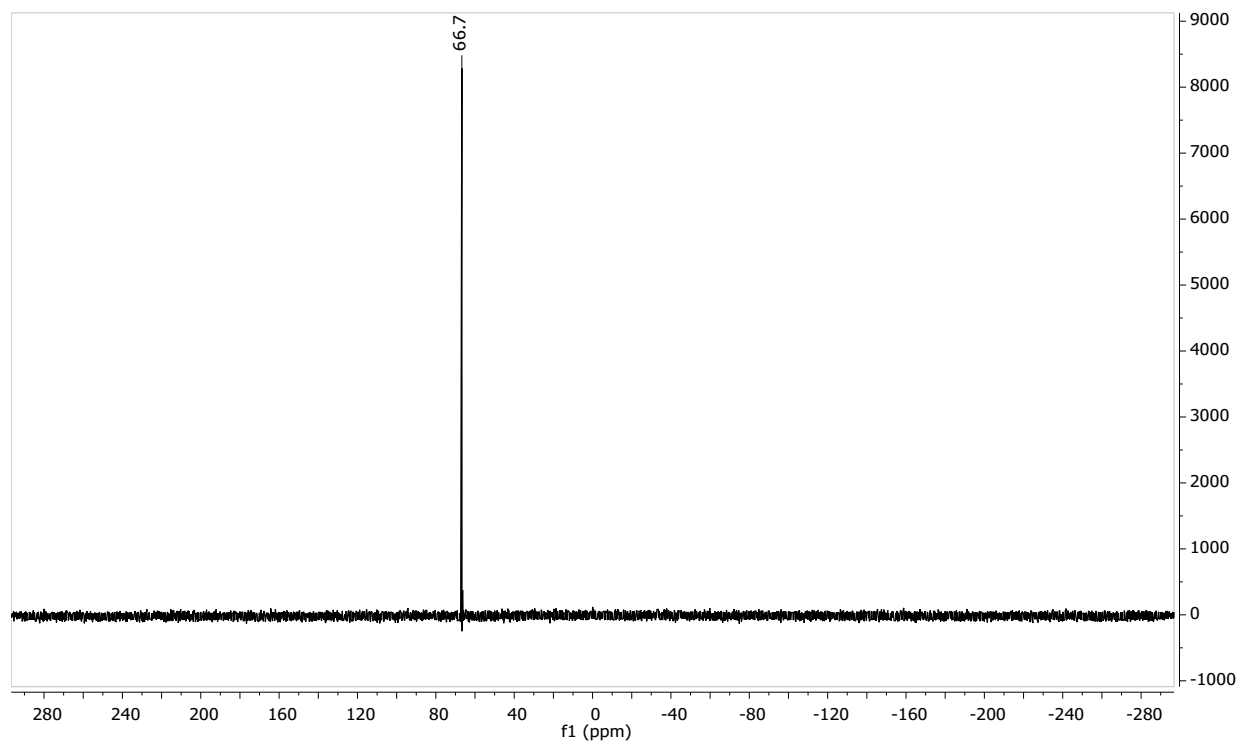

Figure S9.  $^{31}\text{P}\{^1\text{H}\}$  NMR spectrum of **2** in  $\text{CDCl}_3$ .

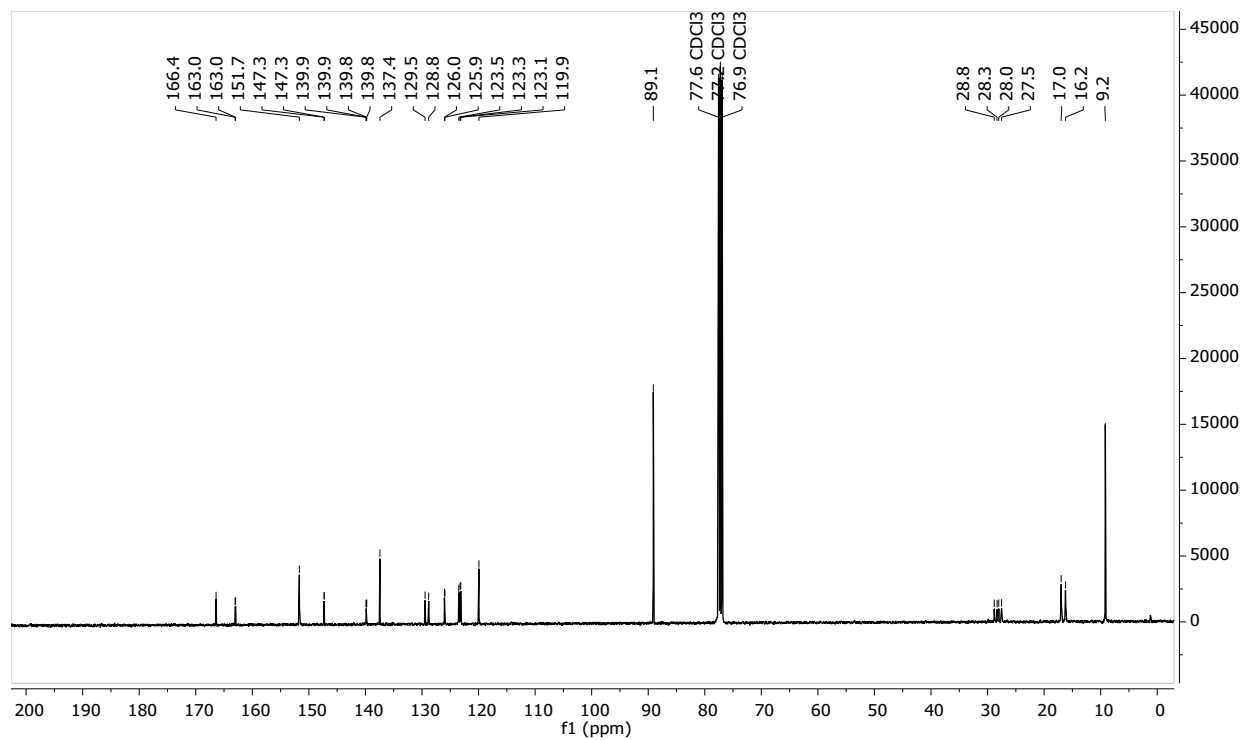

Figure S10.  $^{13}\text{C}\{^1\text{H}\}$  NMR spectrum of **2** in  $\text{CDCl}_3$ .

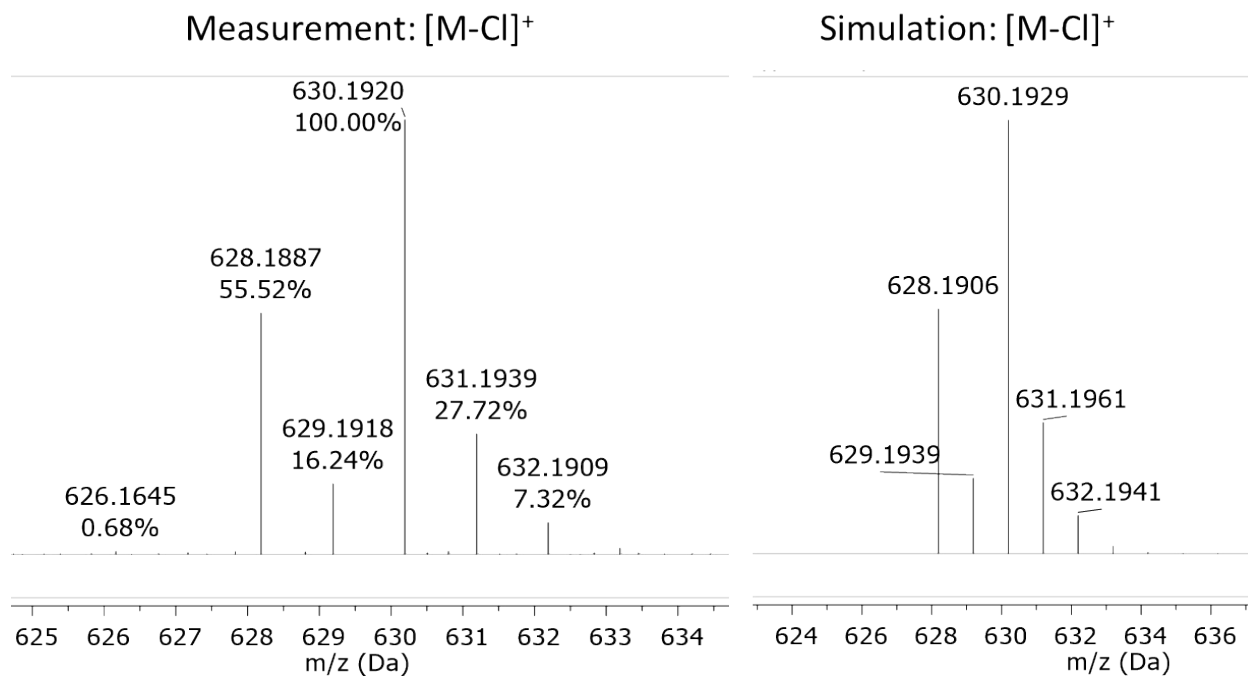

Figure S11. HR-ESI-MS (positive mode,  $\text{CH}_3\text{OH}$ ) of **2**,  $m/z$   $[\text{M}-\text{Cl}]^+$ .





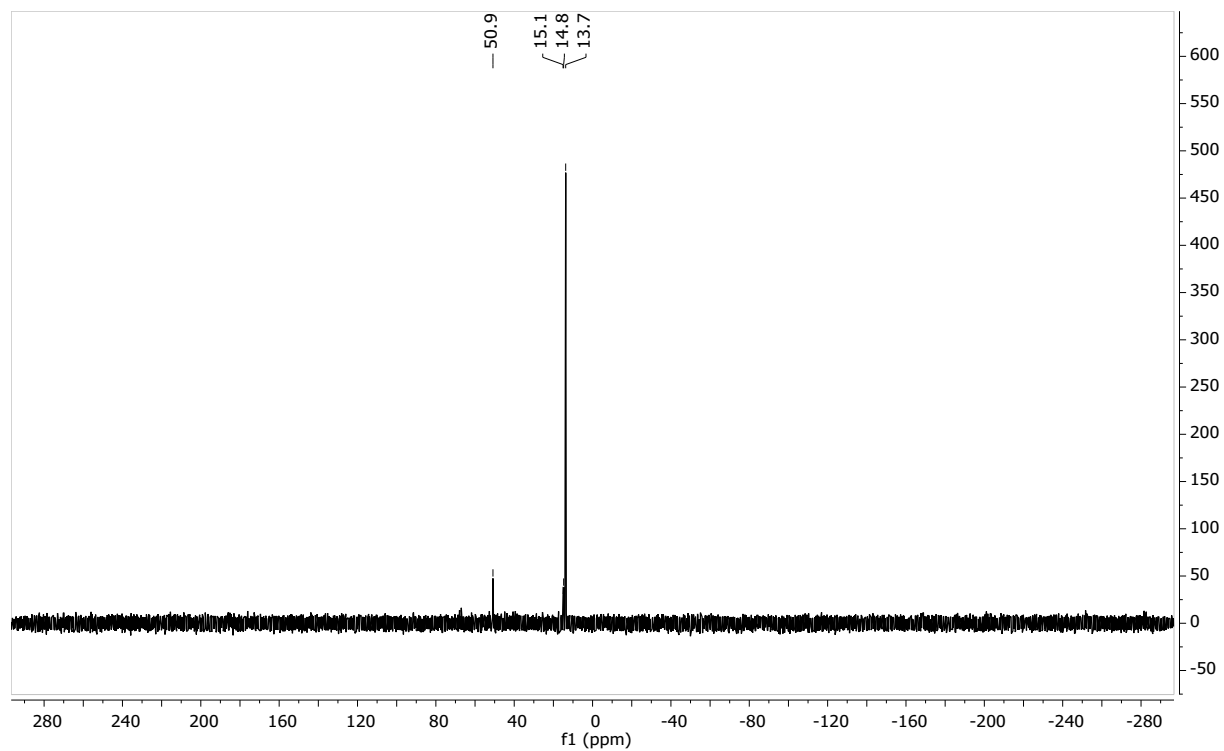

Figure S13.  $^{31}\text{P}\{^1\text{H}\}$  NMR spectrum of **3** in  $\text{CDCl}_3$ .

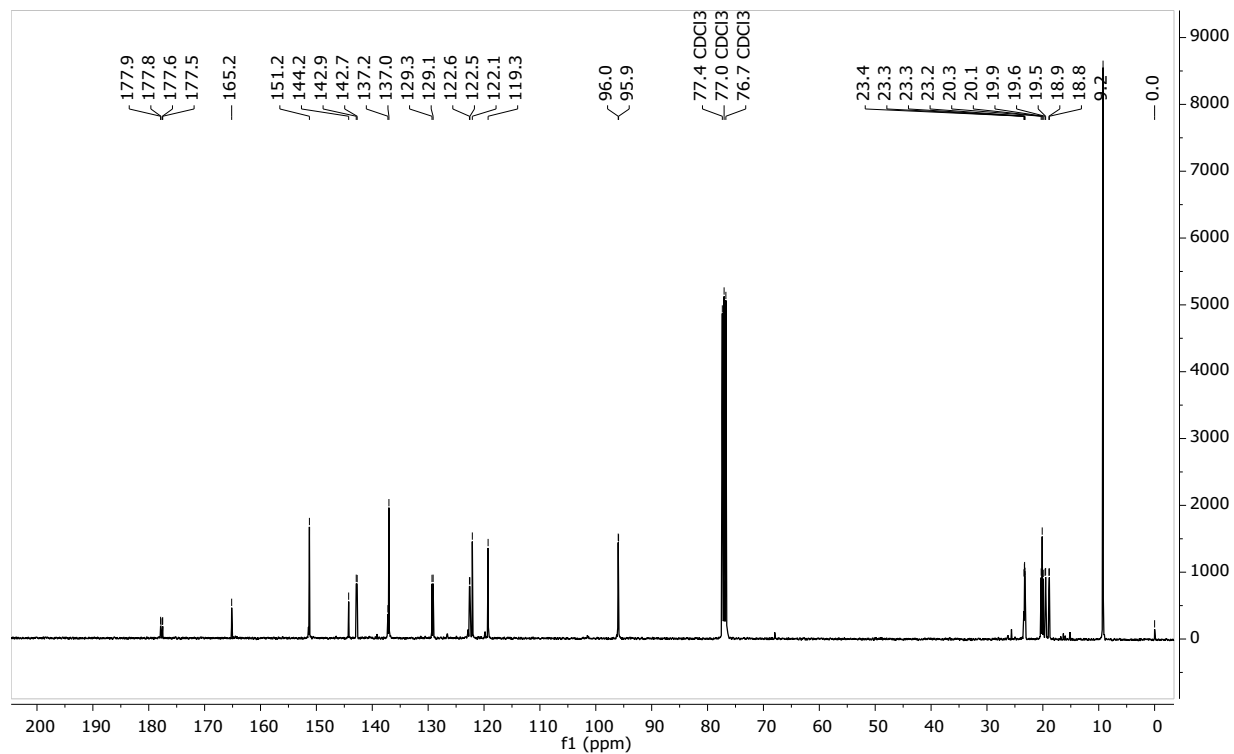

Figure S14.  $^{13}\text{C}\{^1\text{H}\}$  NMR spectrum of **3** in  $\text{CDCl}_3$ .

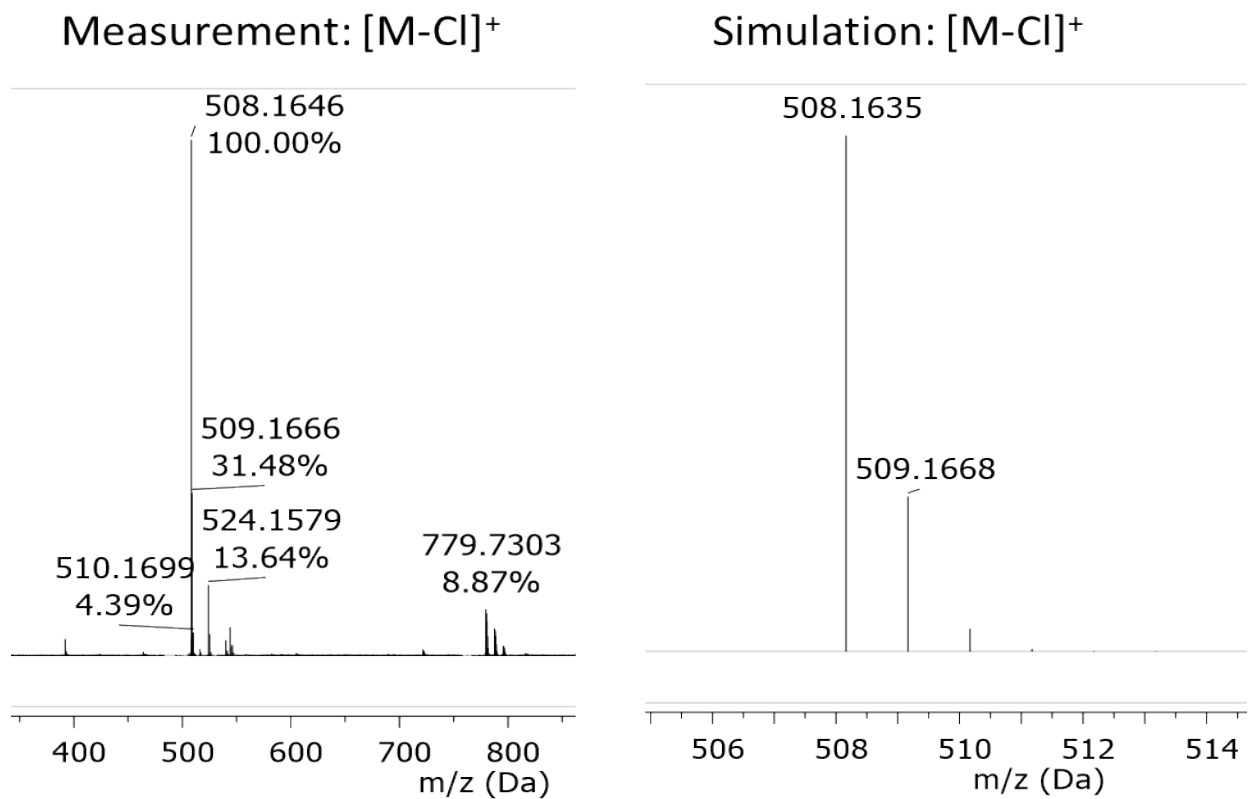

Figure S15. HR-ESI-MS (positive mode, CH<sub>3</sub>OH) of **3**, *m/z* [M-Cl]<sup>+</sup>.

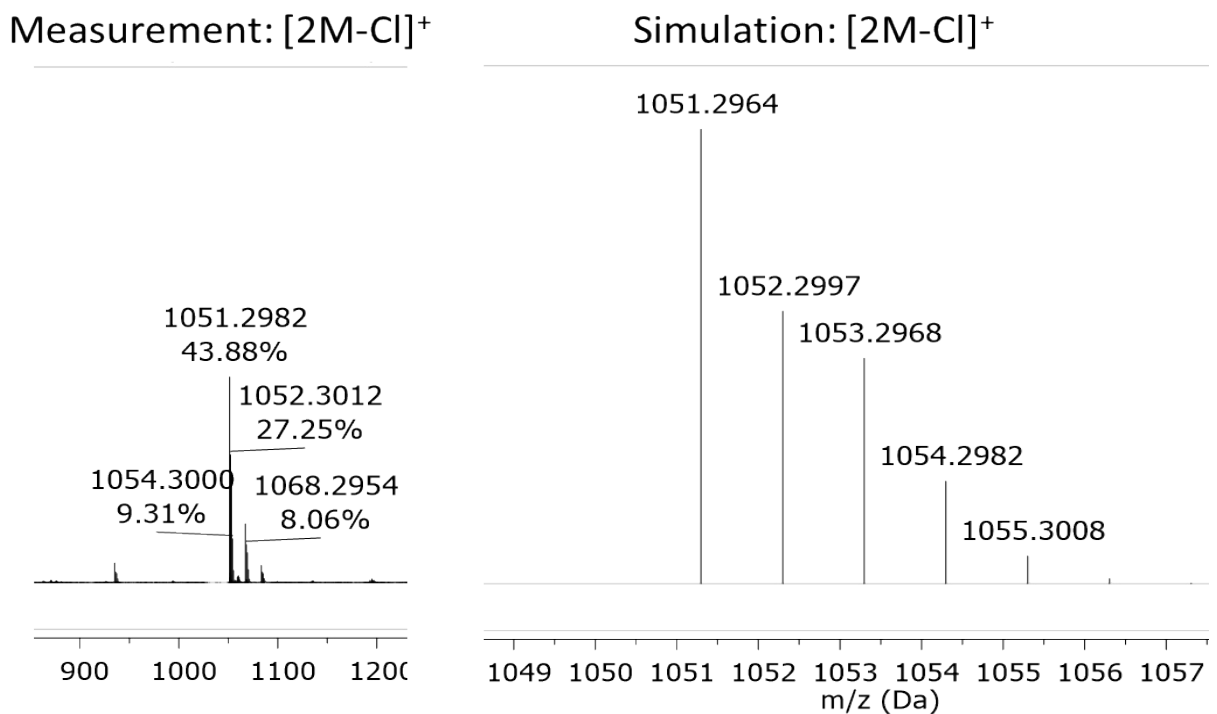

Figure S16. HR-ESI-MS (positive mode, CH<sub>3</sub>OH) of **3**, *m/z* [2M-Cl]<sup>+</sup>.

# Spectra of complex **5**

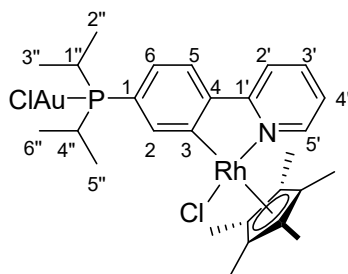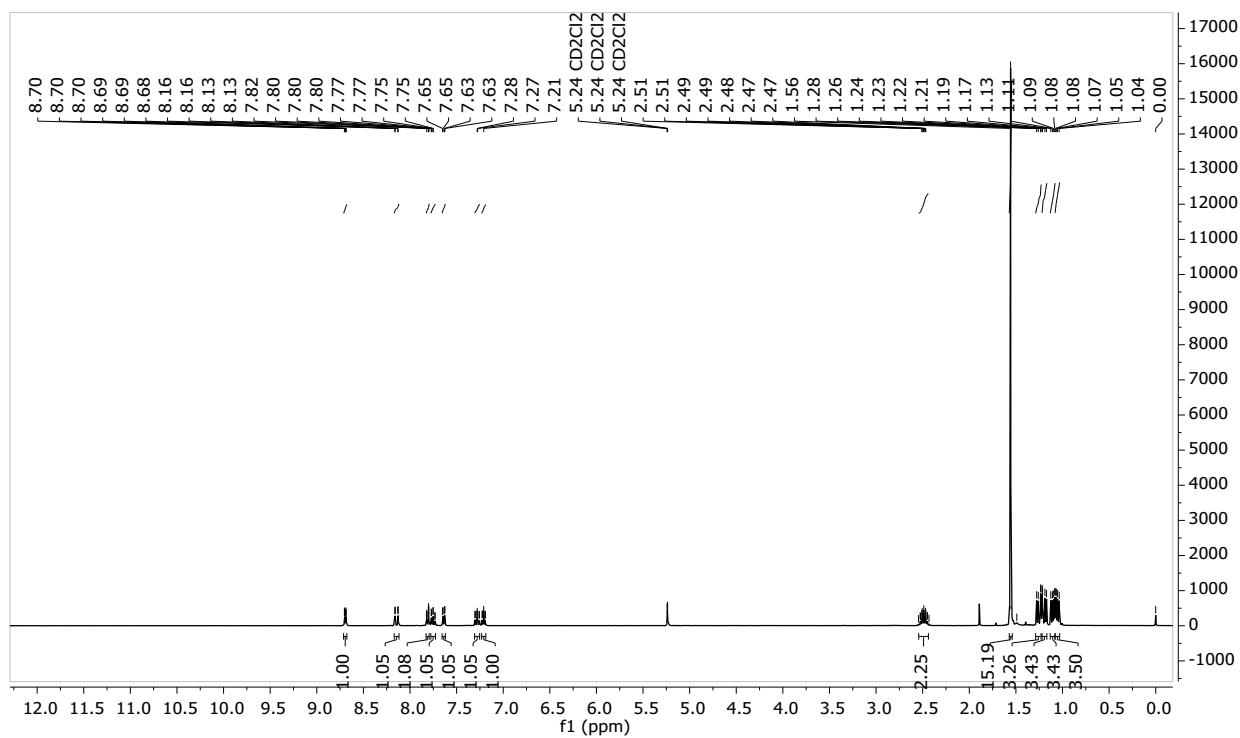

Figure S17.  $^1\text{H}$  NMR spectrum of **5** in  $\text{CD}_2\text{Cl}_2$ .

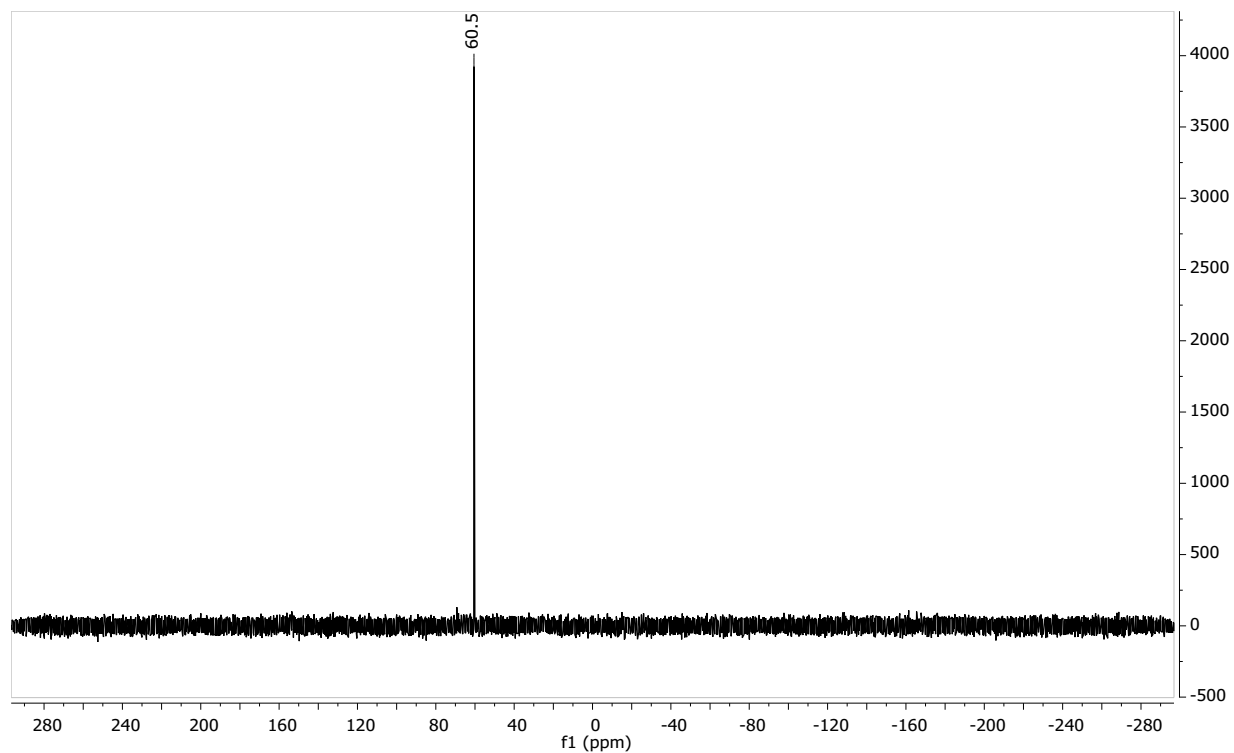

Figure S18.  $^{31}\text{P}\{^1\text{H}\}$  NMR spectrum of **5** in  $\text{CD}_2\text{Cl}_2$ .

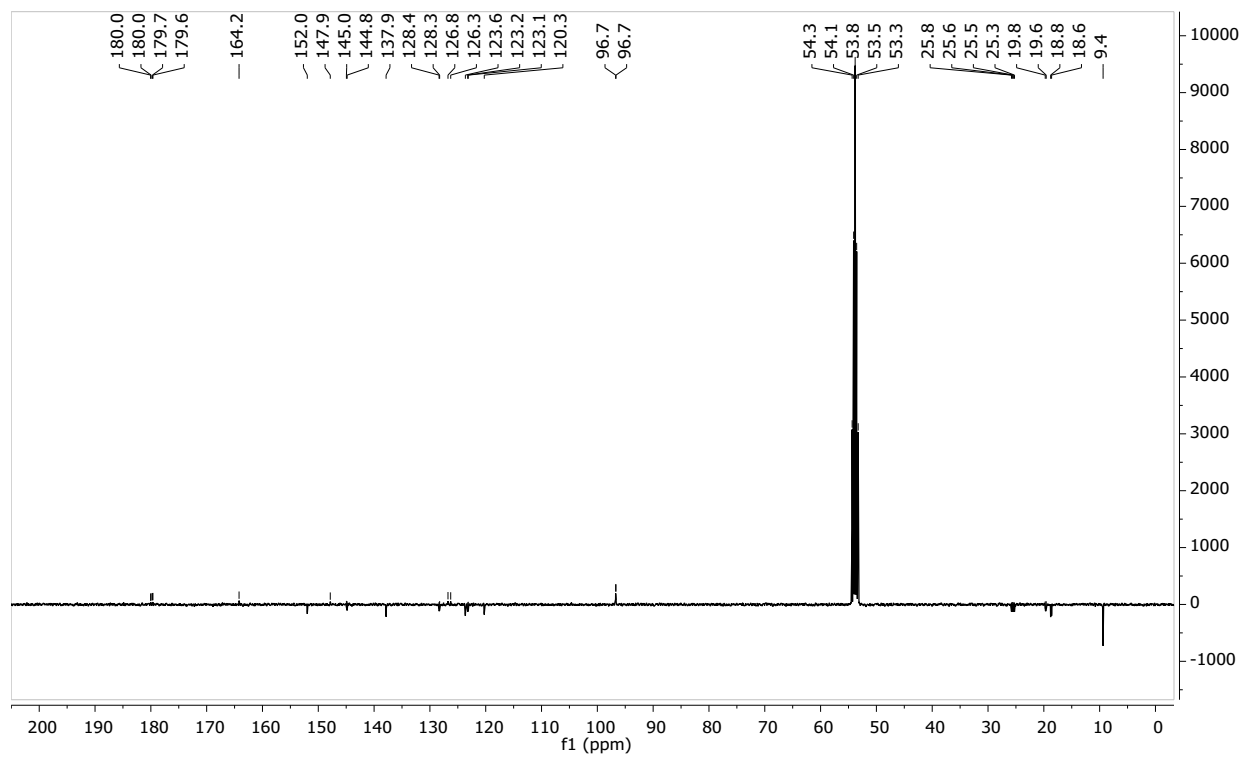

Figure S19.  $^{13}\text{C}\{^1\text{H}\}$  NMR spectrum of **5** in  $\text{CD}_2\text{Cl}_2$ .

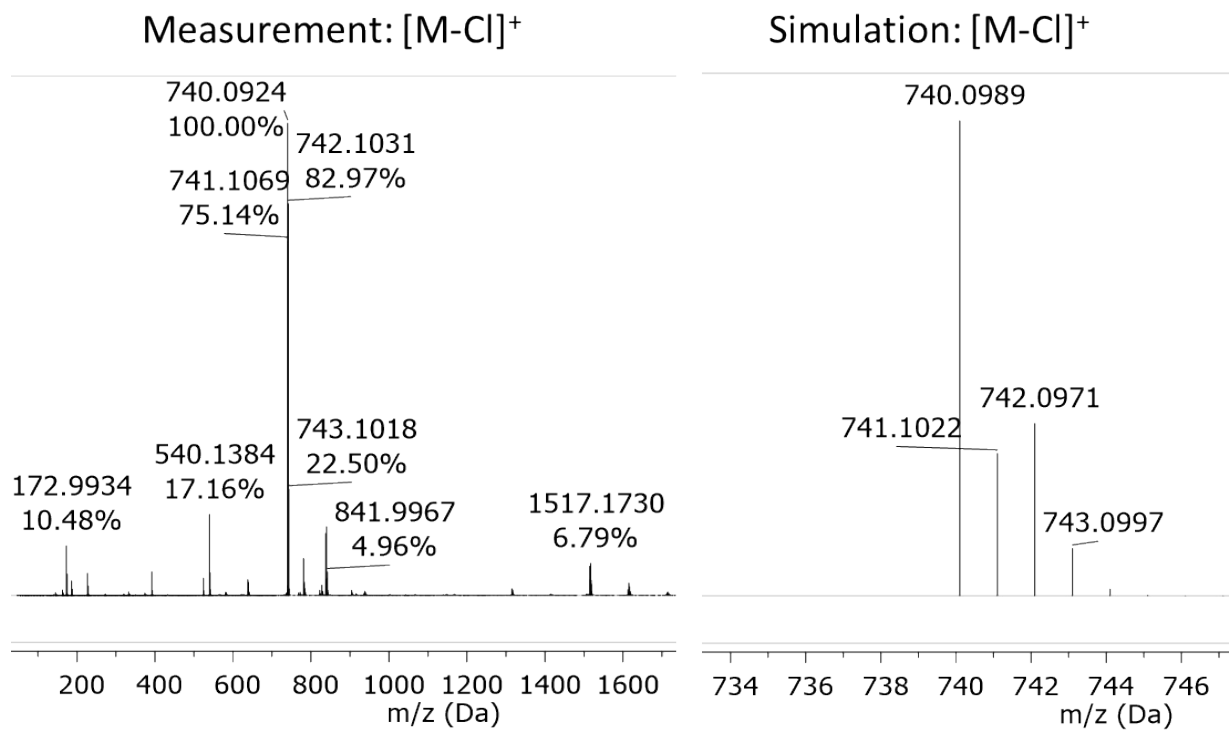

Figure S20. HR-ESI-MS (positive mode,  $CH_3OH$ ) of **5**,  $m/z$   $[M-Cl]^+$ .

### Spectra of complex **6**

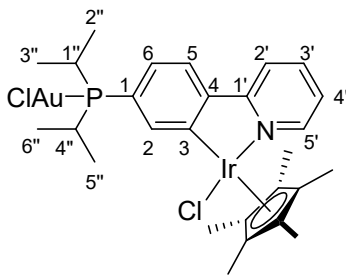

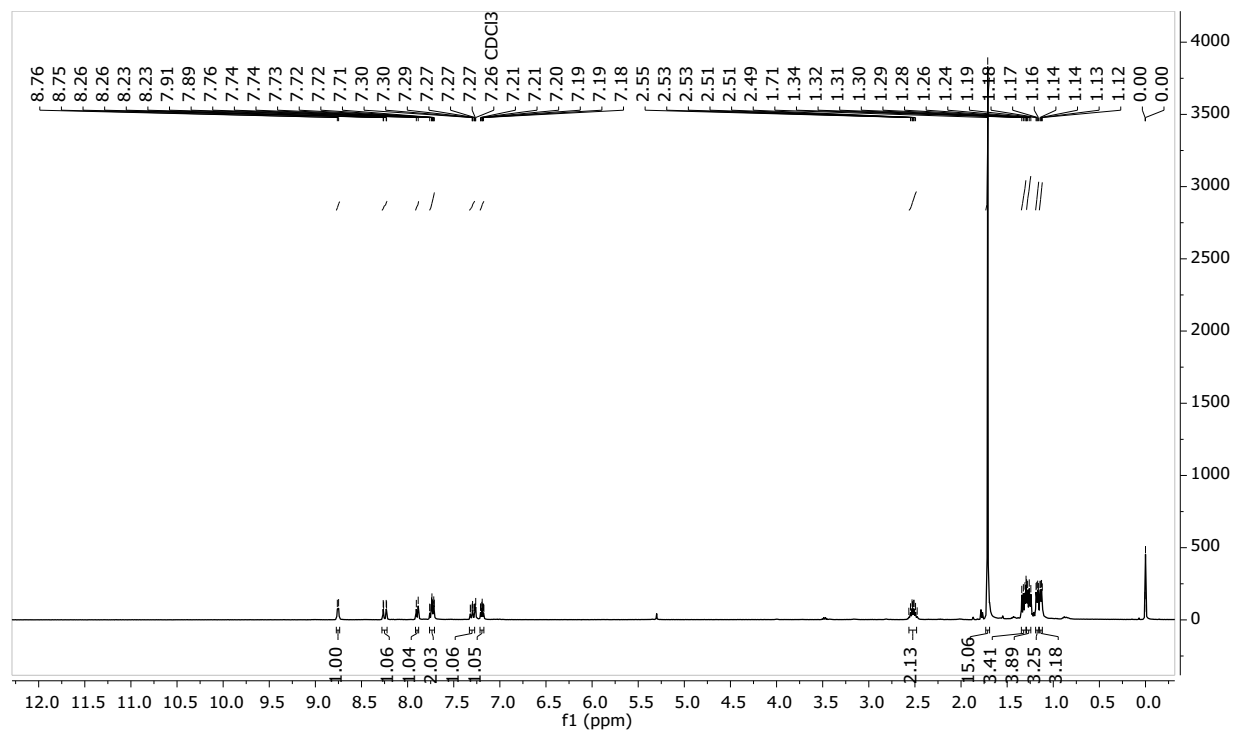

Figure S21.  $^1\text{H}$  NMR spectrum of **6** in  $\text{CDCl}_3$ .

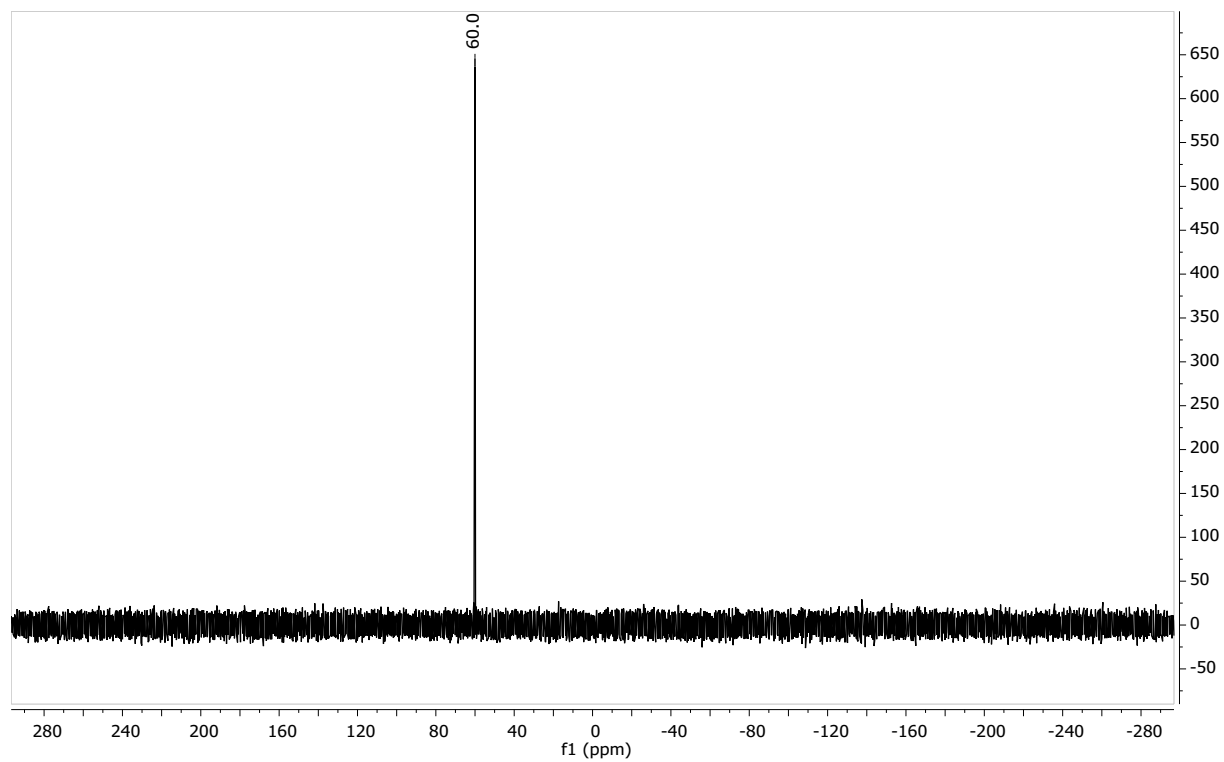

Figure S22.  $^{31}\text{P}\{^1\text{H}\}$  NMR spectrum of **6** in  $\text{CDCl}_3$ .

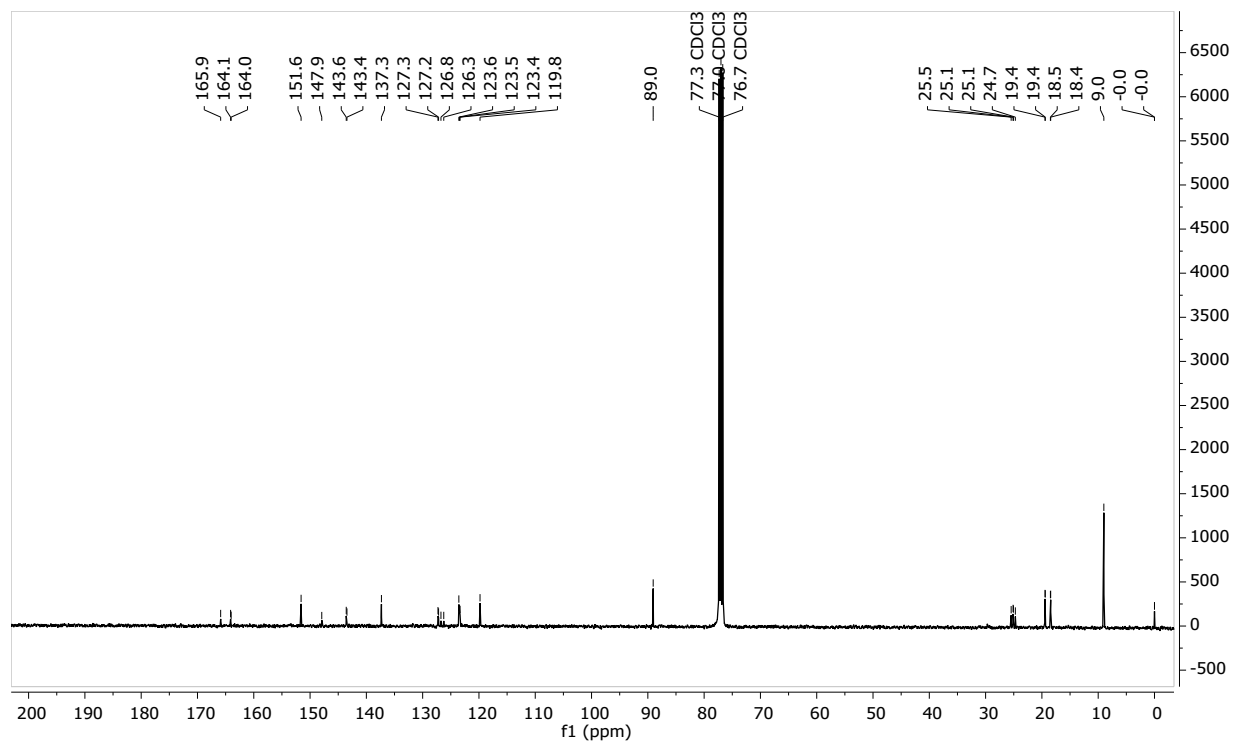

Figure S23.  $^{13}\text{C}\{^1\text{H}\}$  NMR spectrum of **6** in  $\text{CDCl}_3$ .

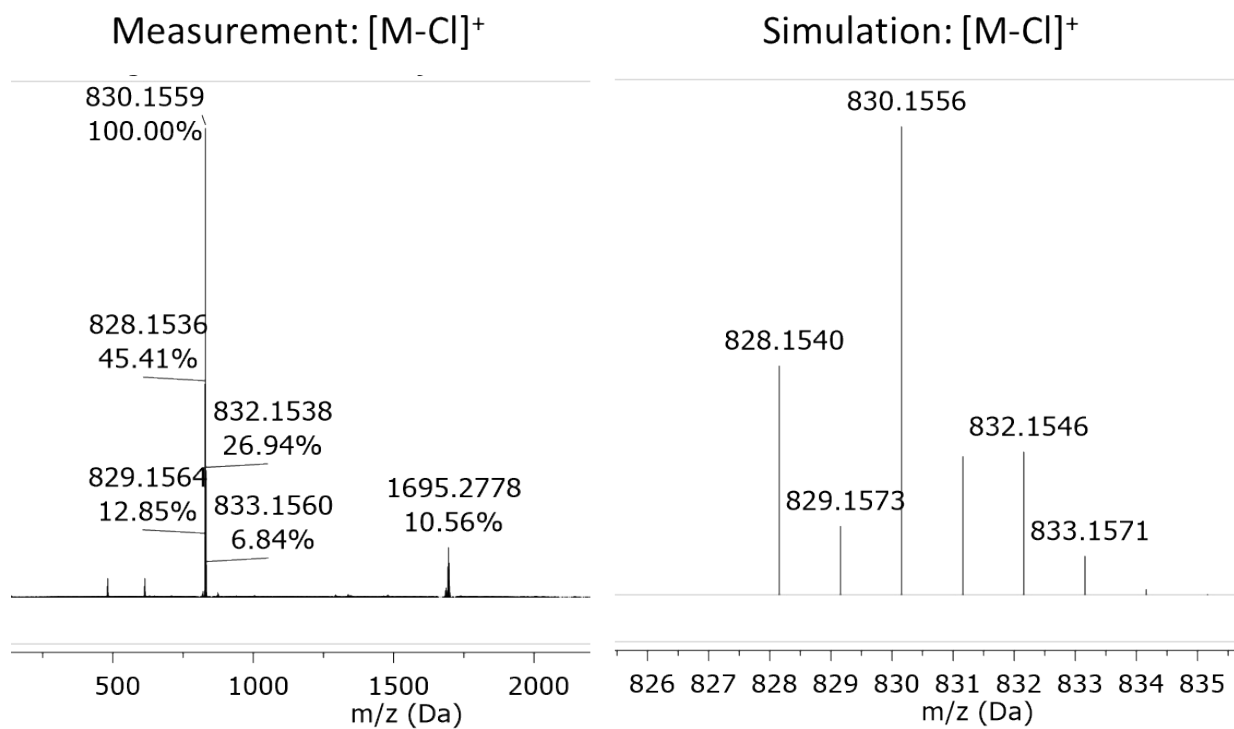

Figure S24. HR-ESI-MS (positive mode,  $\text{CH}_3\text{OH}$ ) of **6**,  $m/z$   $[\text{M}-\text{Cl}]^+$ .



# Spectra of complex **7**

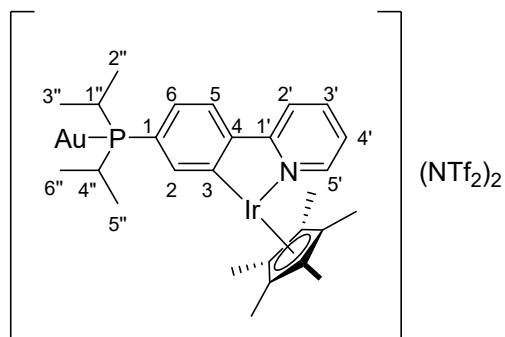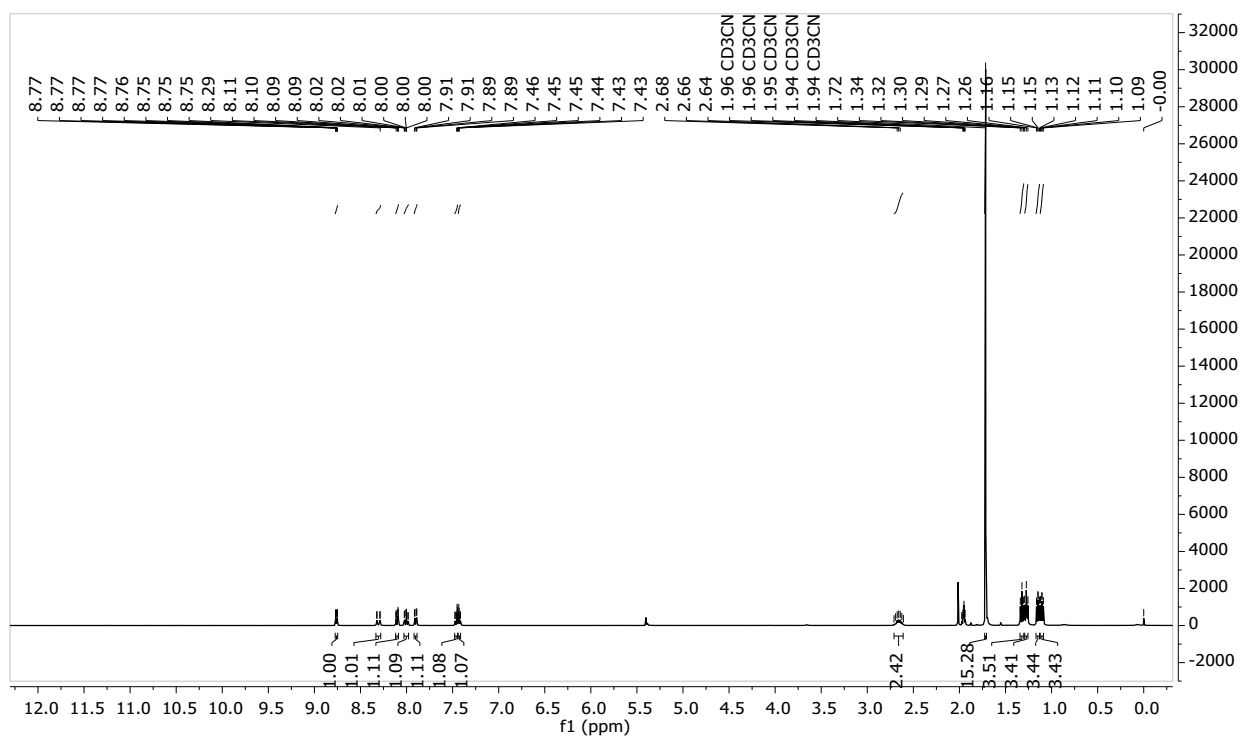

Figure S25.  $^1H$  NMR spectrum of **7** in  $CD_3CN/CD_2Cl_2$ .

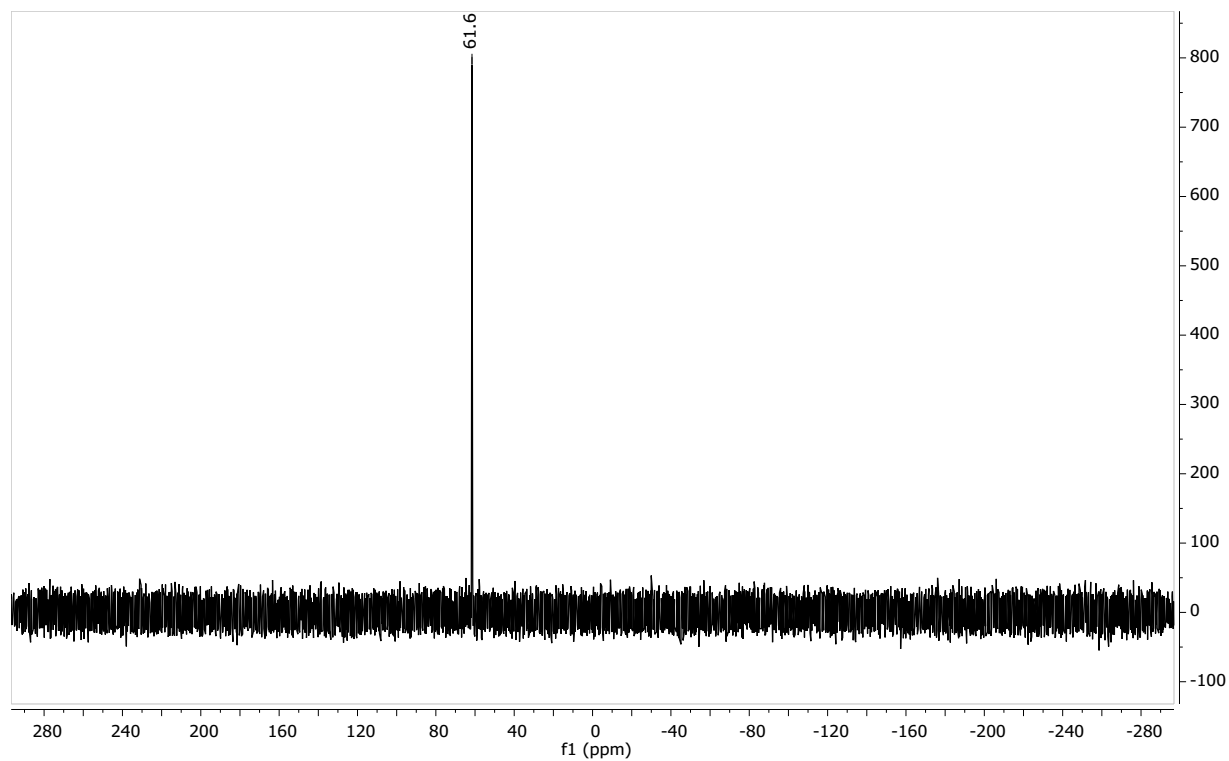

Figure S26.  $^{31}\text{P}\{^1\text{H}\}$  NMR spectrum of **7** in  $\text{CD}_3\text{CN}/\text{CD}_2\text{Cl}_2$ .

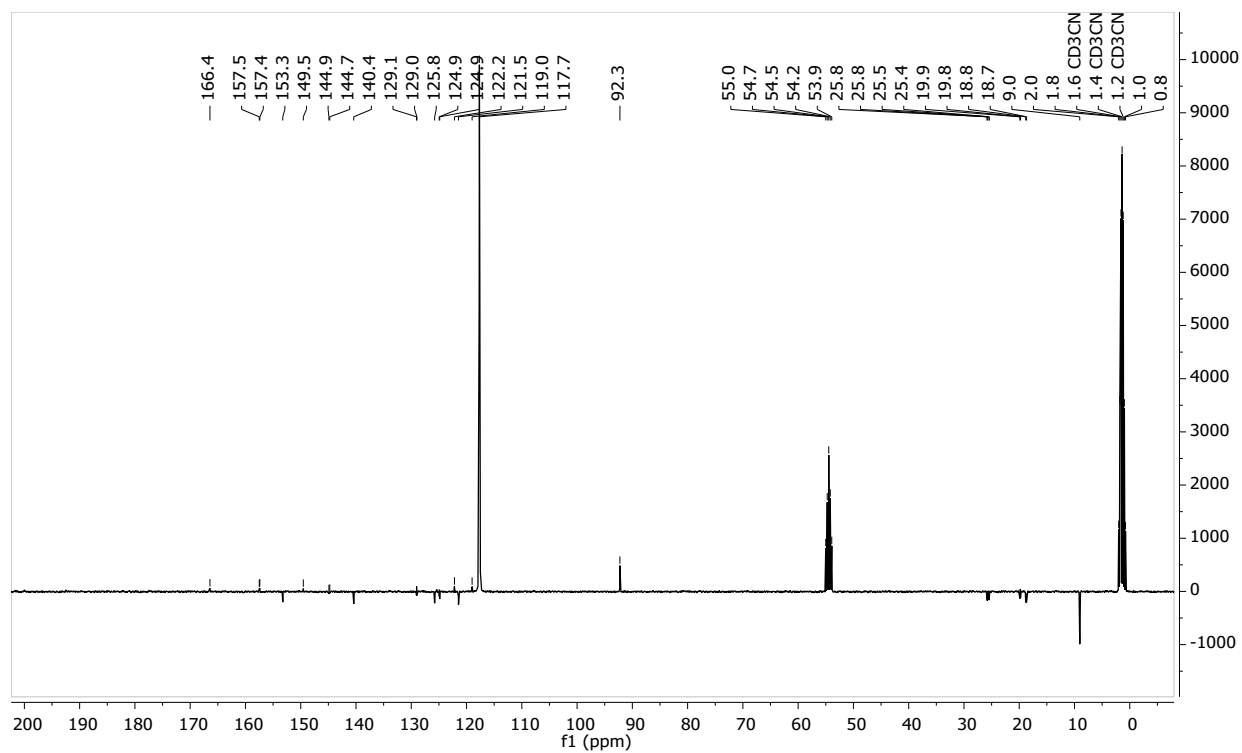

Figure S27.  $^{13}\text{C}\{^1\text{H}\}$  NMR spectrum of **7** in  $\text{CD}_3\text{CN}/\text{CD}_2\text{Cl}_2$ .

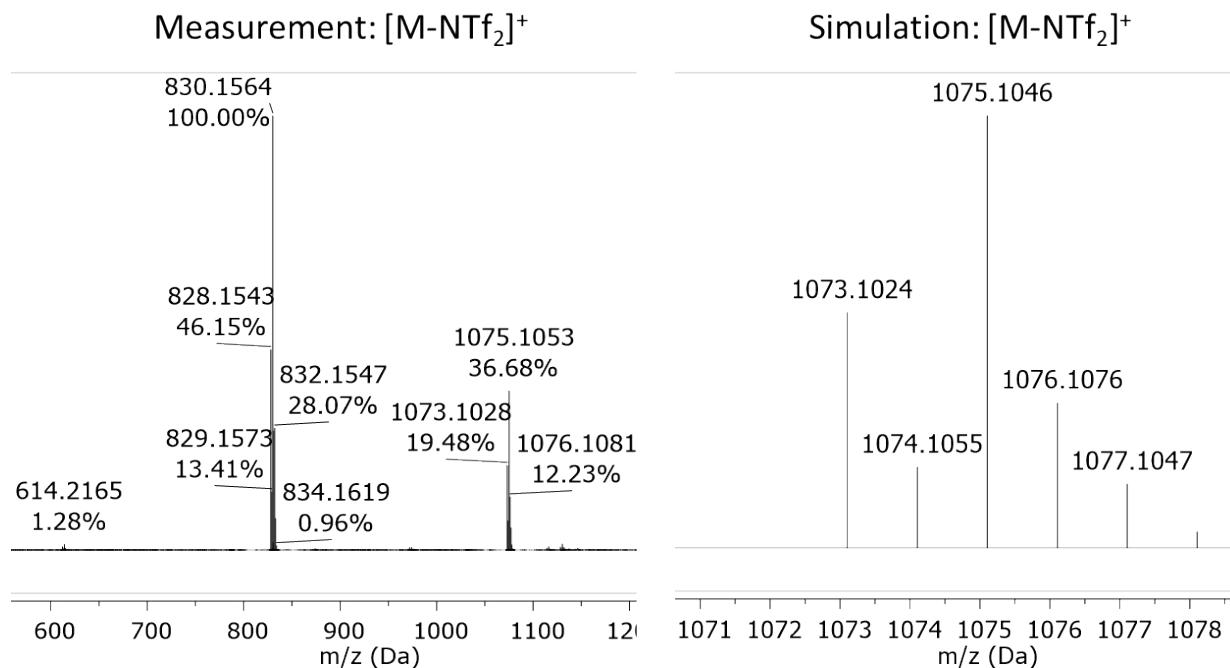

Figure S28. HR-ESI-MS (positive mode,  $CH_3OH$ ) of **7**,  $m/z [M-NTf_2]^+$ . The signal at 830.1564 can be assigned to  $[MCl]^+$  (see Figure S24), indicating the presence of **6** ( $[M-Cl]^+$ ) or the monocationic complex with one  $NTf_2$  anion ( $[M-NTf_2]^+$ ) as an impurity.

### Spectra of complex **8**

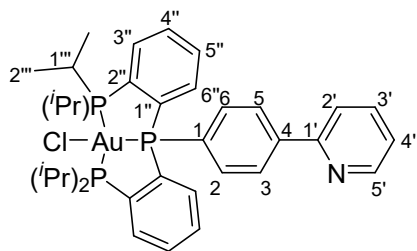

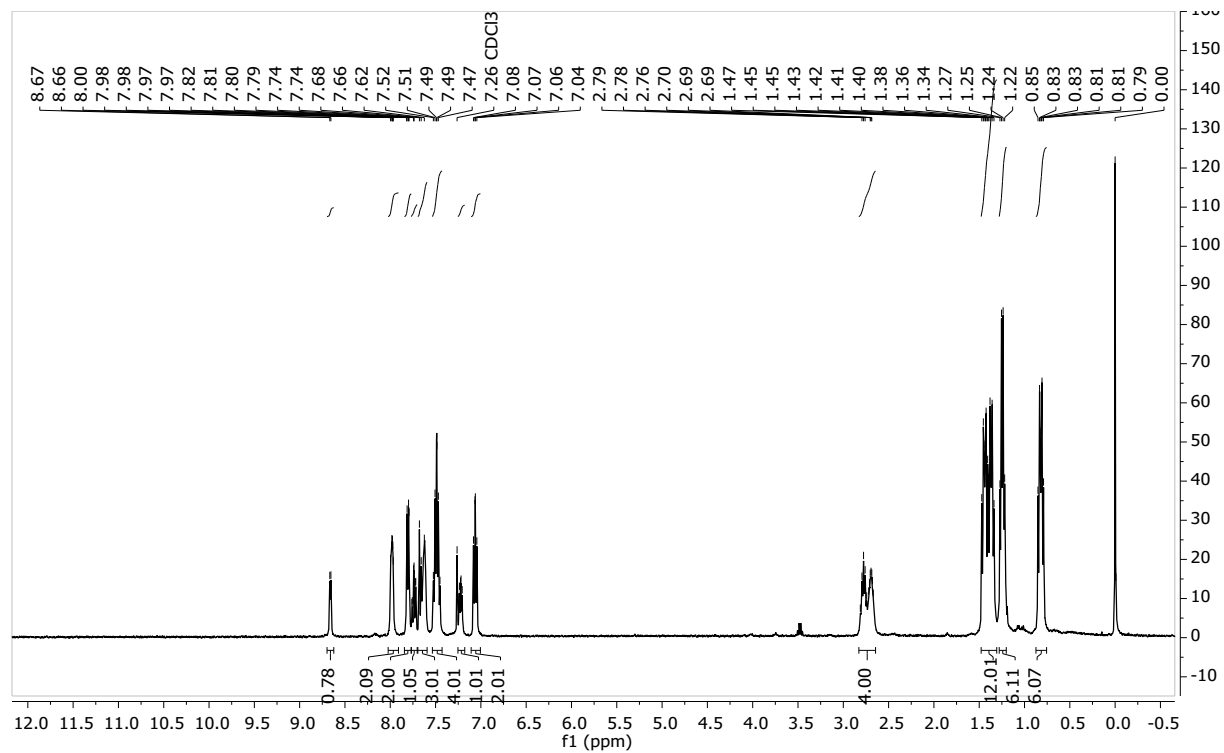

Figure S29. <sup>1</sup>H NMR spectrum of **8** in CDCl<sub>3</sub>.

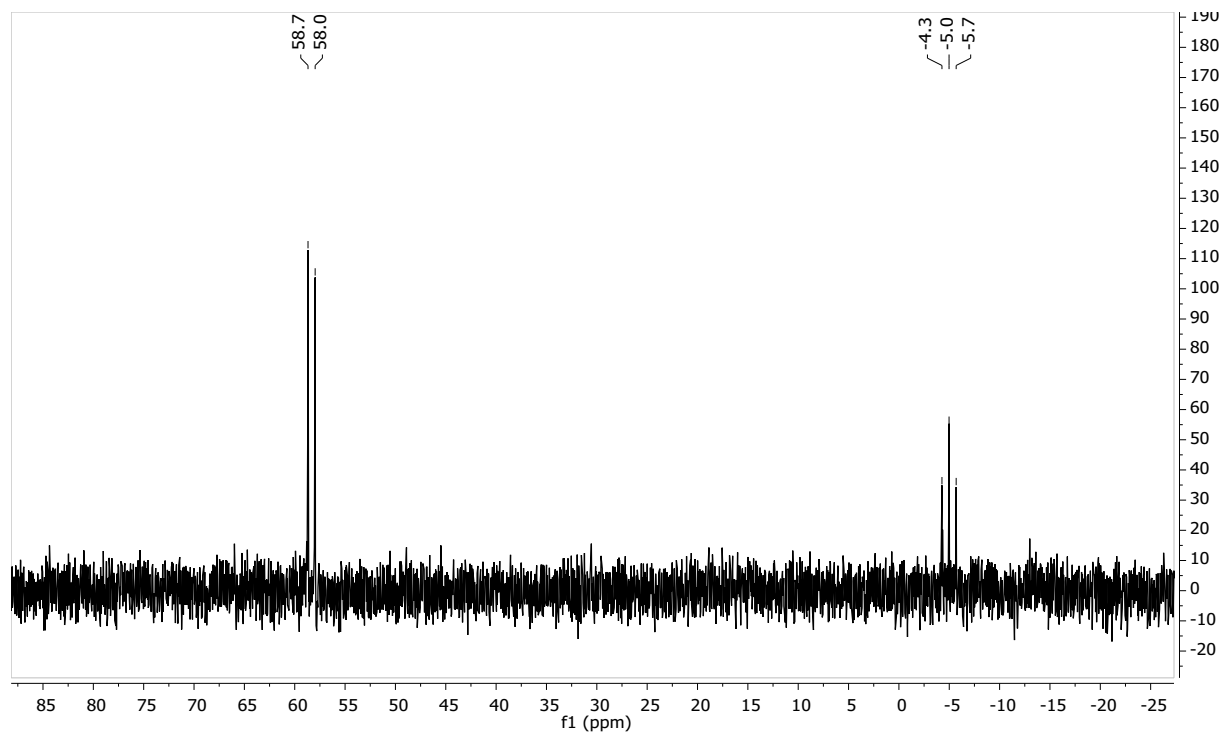

Figure S30. <sup>31</sup>P{<sup>1</sup>H} NMR spectrum of **8** in CDCl<sub>3</sub>.

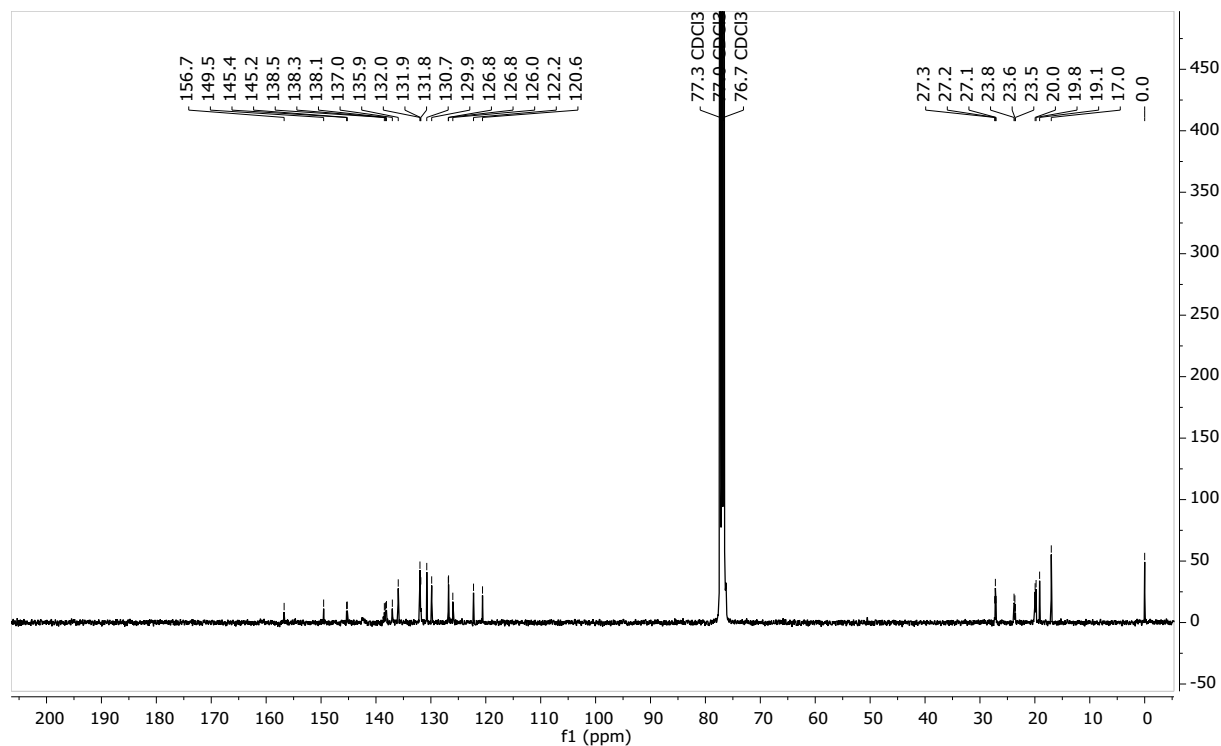

Figure S31.  $^{13}\text{C}\{^1\text{H}\}$  NMR spectrum of **8** in  $\text{CDCl}_3$ .

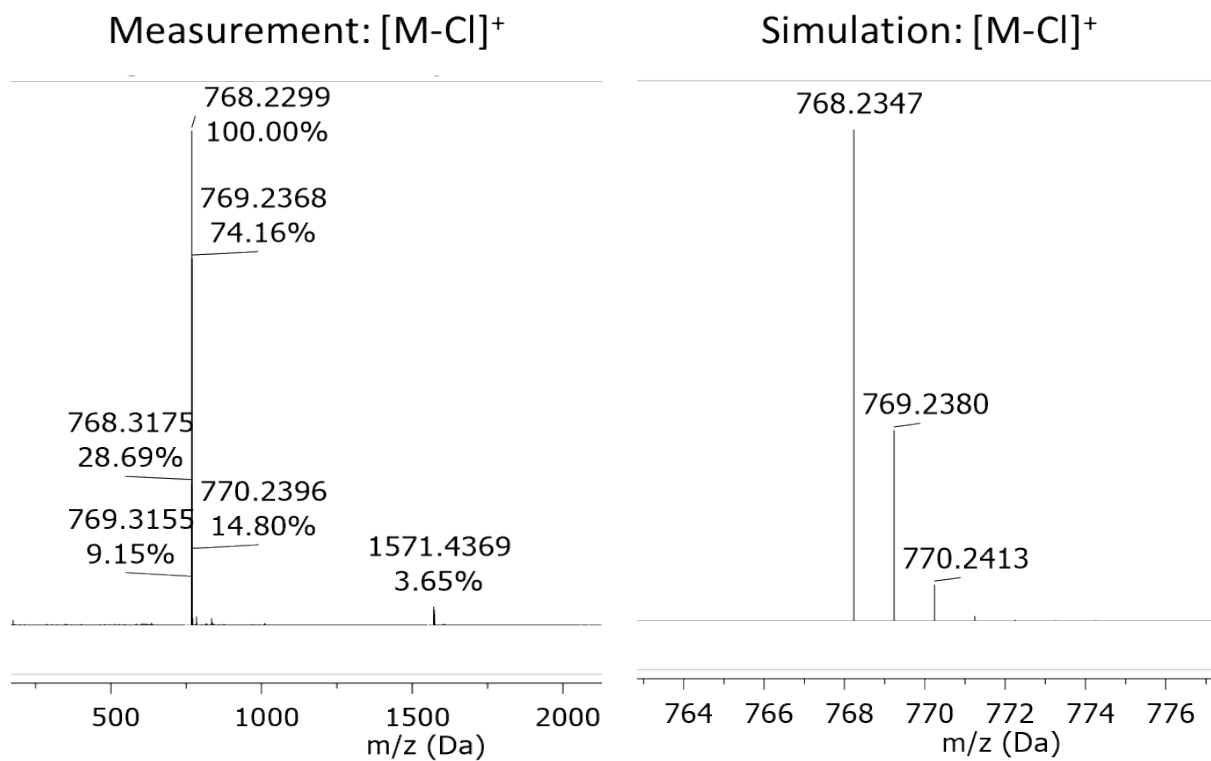

Figure S32. HR-ESI-MS (positive mode,  $\text{CH}_3\text{OH}$ ) of **8**,  $m/z$   $[\text{M}-\text{Cl}]^+$ .

# Spectra of complex **9**

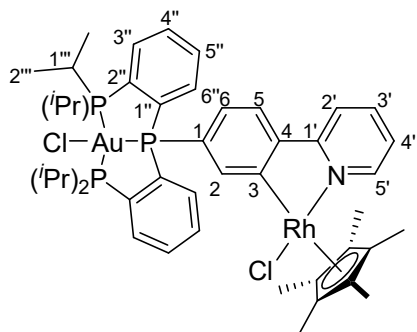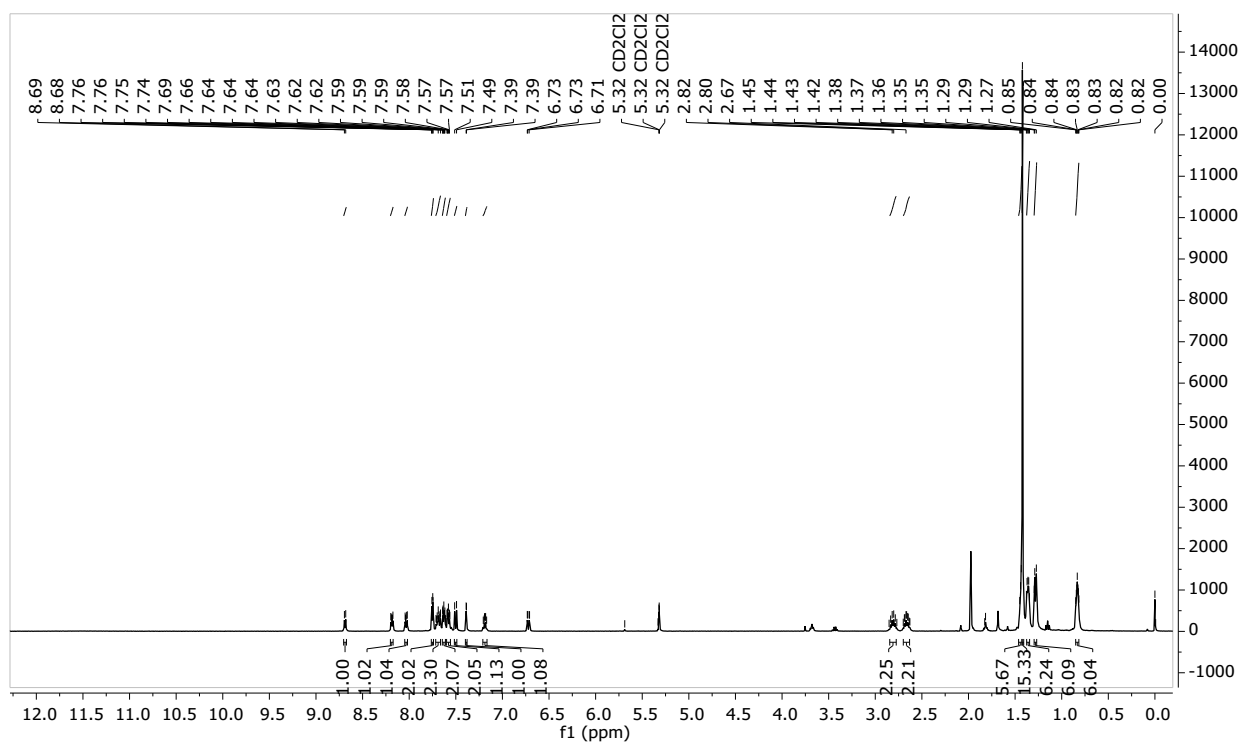

Figure S33.  $^1\text{H}$  NMR spectrum of **9** in  $\text{CD}_2\text{Cl}_2$ .

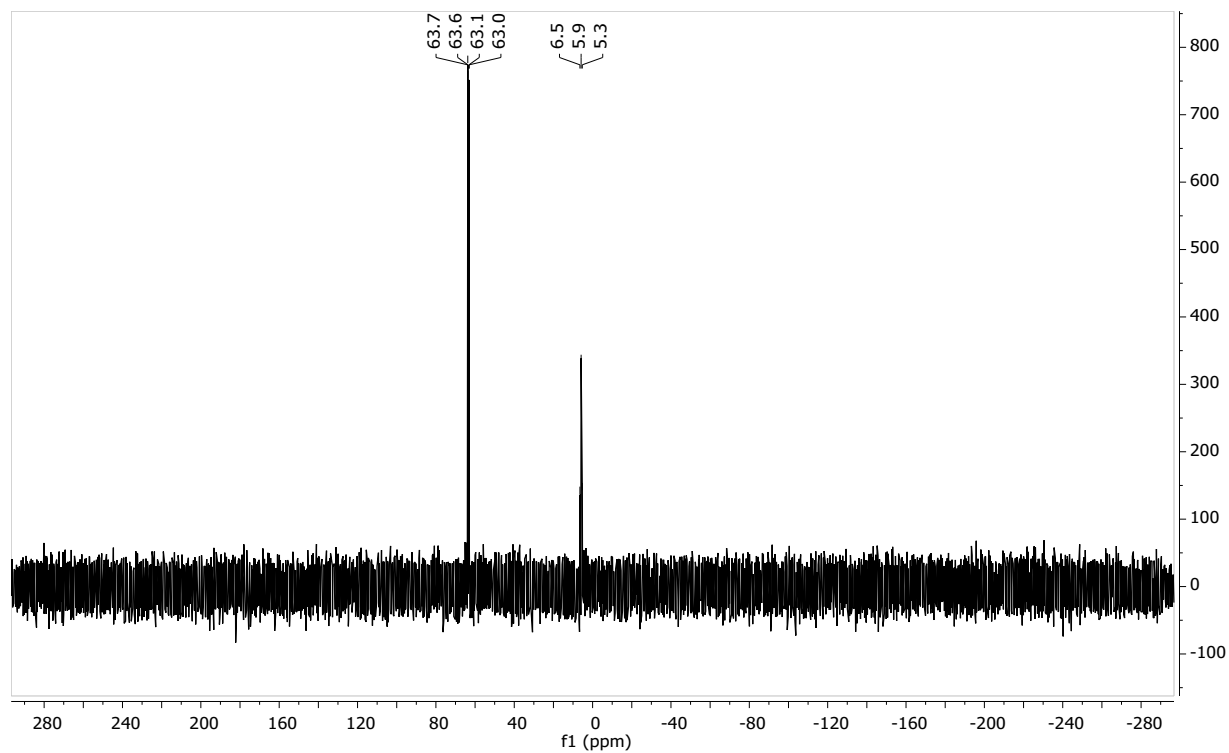

Figure S34.  $^{31}\text{P}\{^1\text{H}\}$  NMR spectrum of **9** in  $\text{CD}_2\text{Cl}_2$ .

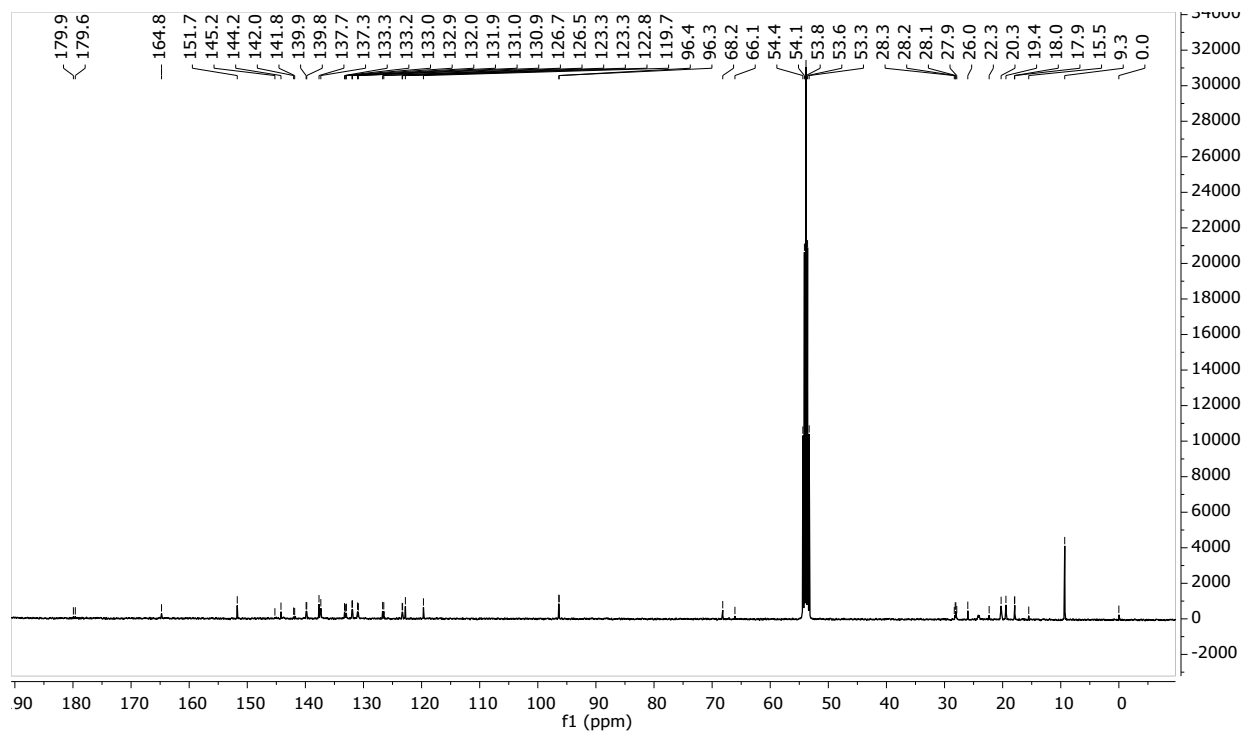

Figure S35.  $^{13}\text{C}\{^1\text{H}\}$  NMR spectrum of **9** in  $\text{CD}_2\text{Cl}_2$ .

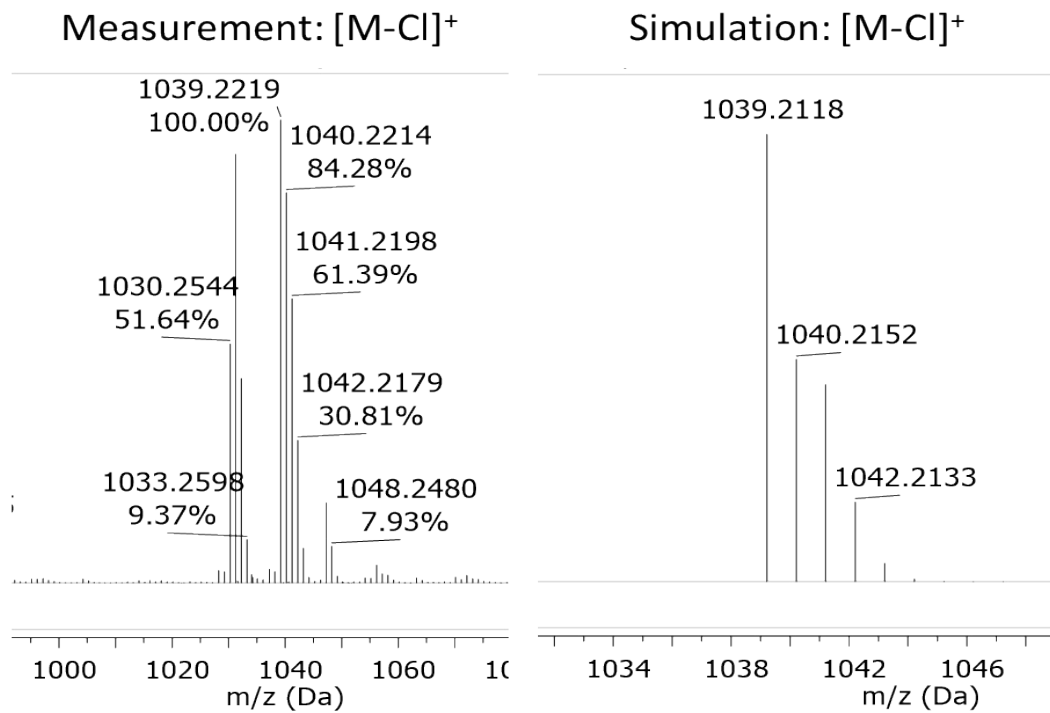

Figure S36. HR-ESI-MS (positive mode, CH<sub>3</sub>OH) of **9**,  $m/z$  [M-Cl]<sup>+</sup>.

### Spectra of complex **10**

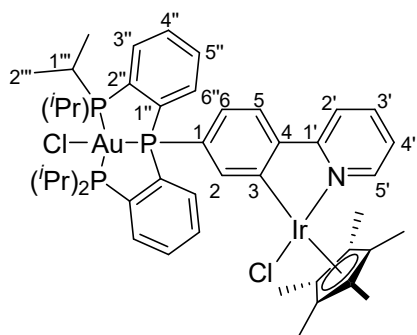



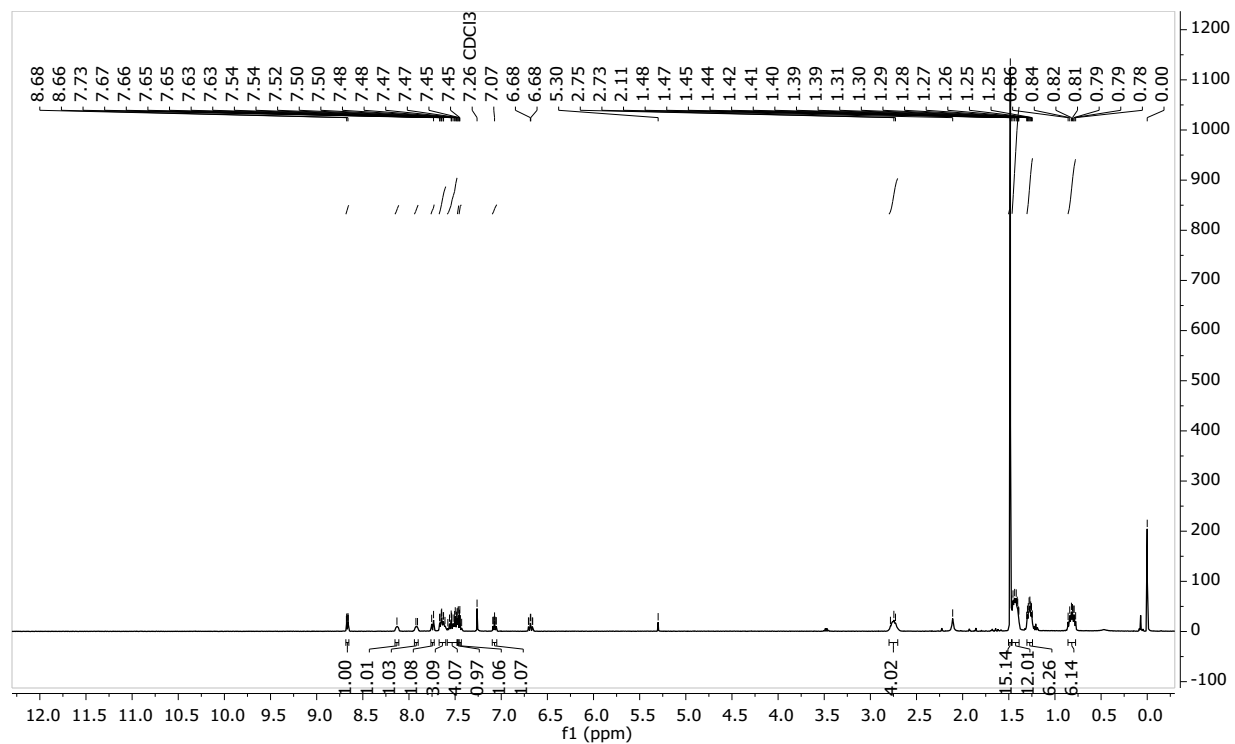

Figure S37. <sup>1</sup>H NMR spectrum of **10** in CDCl<sub>3</sub>.

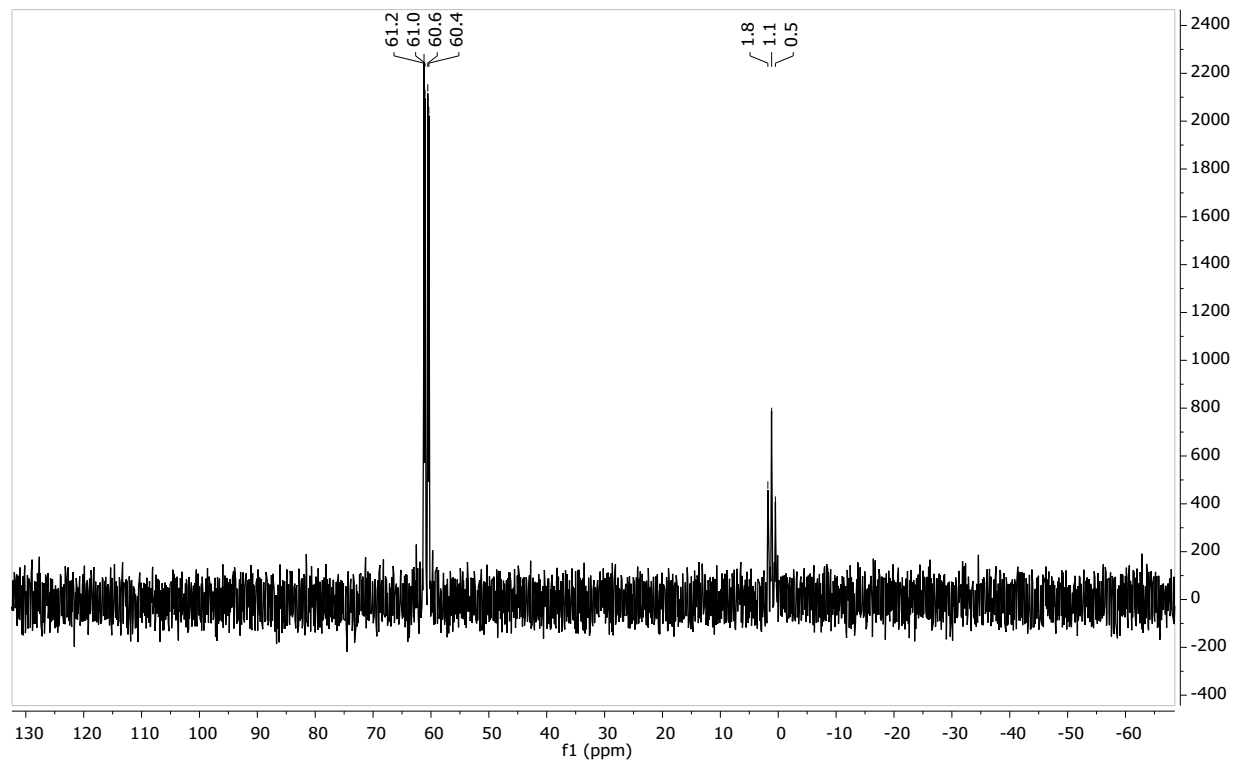

Figure S38. <sup>31</sup>P{<sup>1</sup>H} NMR spectrum of **10** in CDCl<sub>3</sub>.

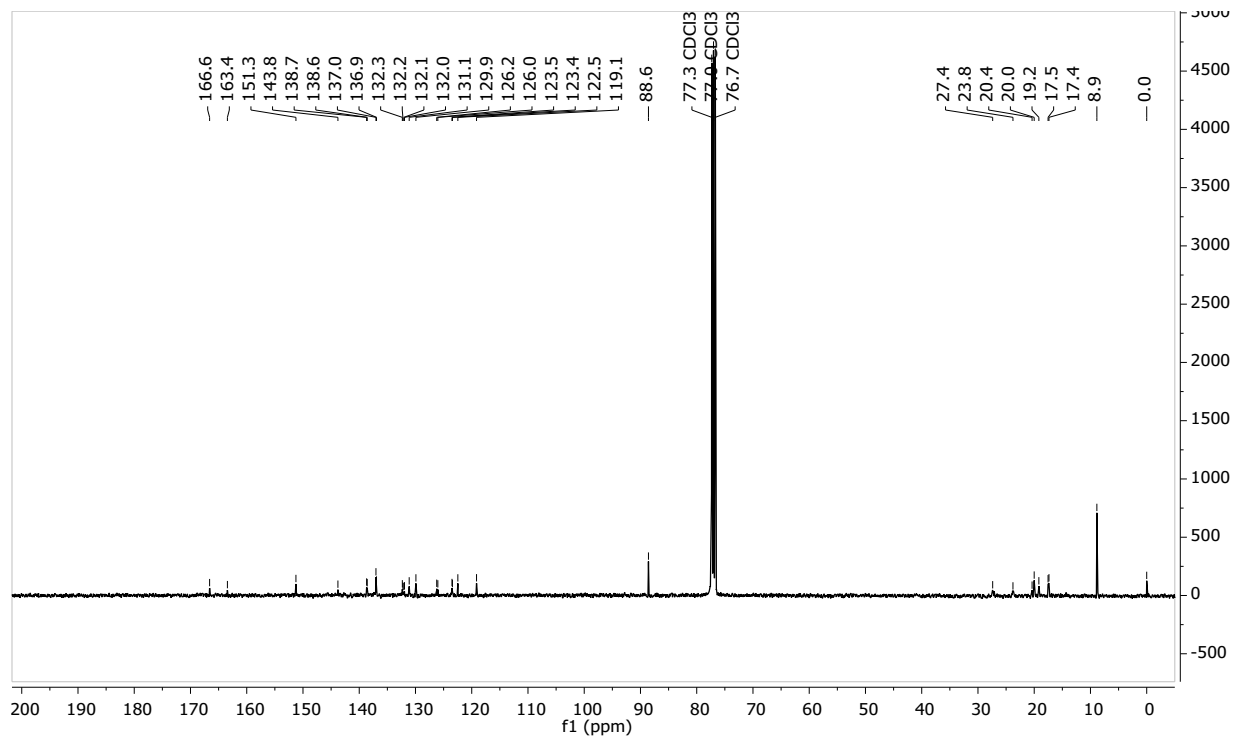

Figure S39.  $^{13}\text{C}\{^1\text{H}\}$  NMR spectrum of **10** in  $\text{CDCl}_3$ .

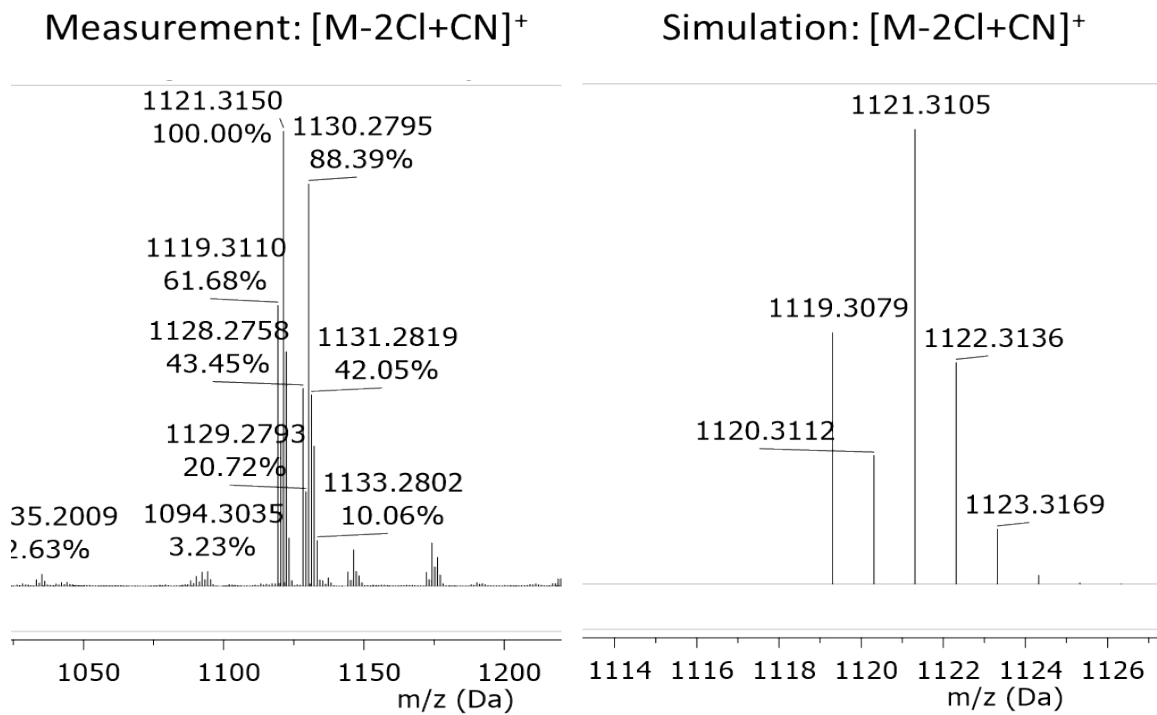

Figure S40. HR-ESI-MS (positive mode,  $\text{CH}_3\text{OH}$ ) of **10**,  $m/z$   $[\text{M}-2\text{Cl}+\text{CN}]^+$ .

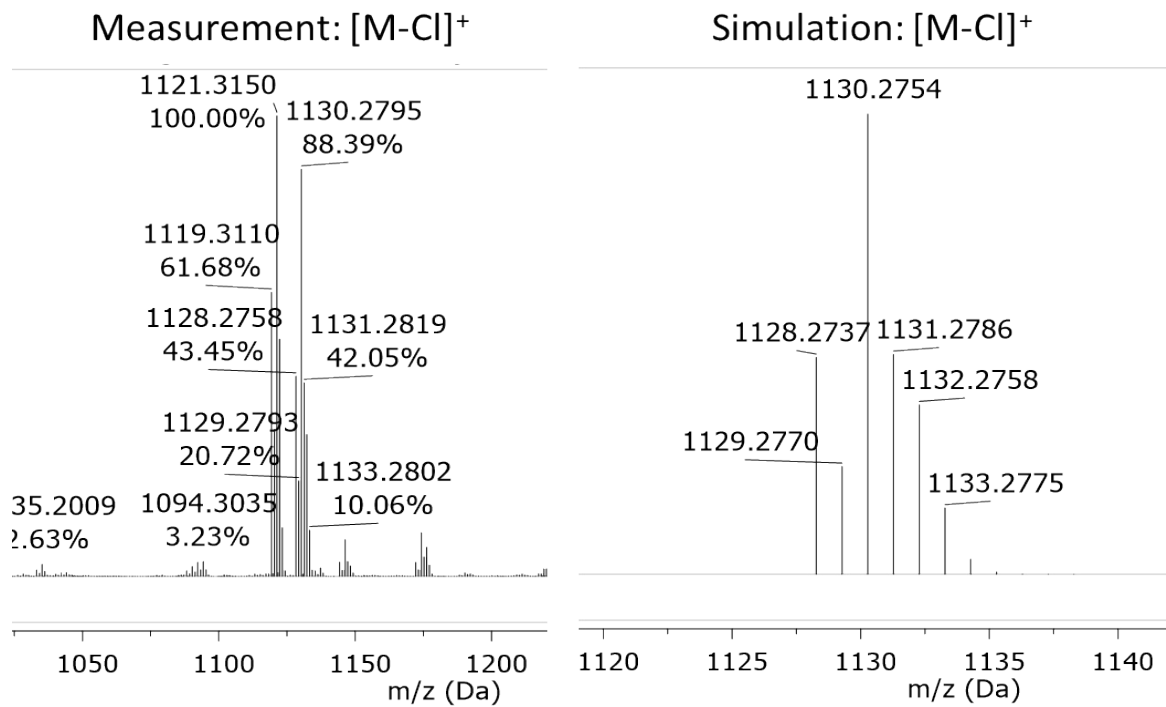

Figure S41. HR-ESI-MS (positive mode, CH<sub>3</sub>OH) of **10**,  $m/z$  [M-Cl]<sup>+</sup>.

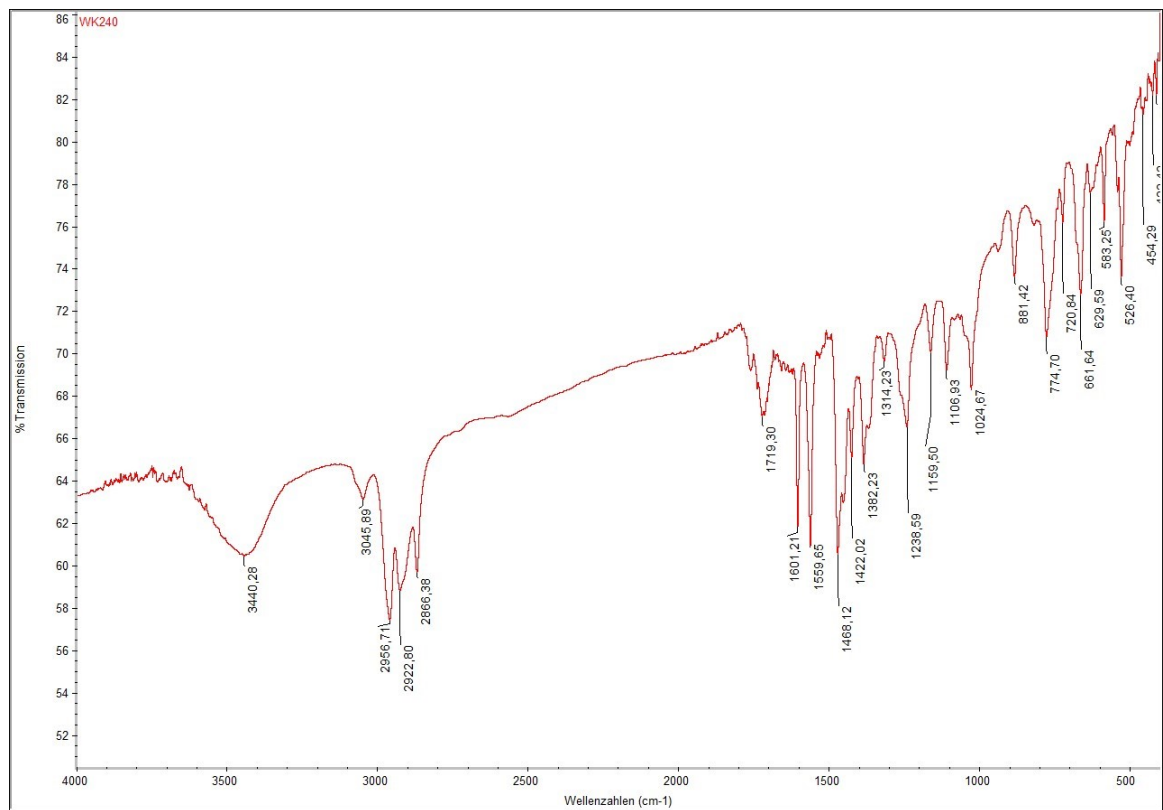

Figure S42. FT-IR (KBr) spectrum of **10**:  $\nu$  (cm<sup>-1</sup>).



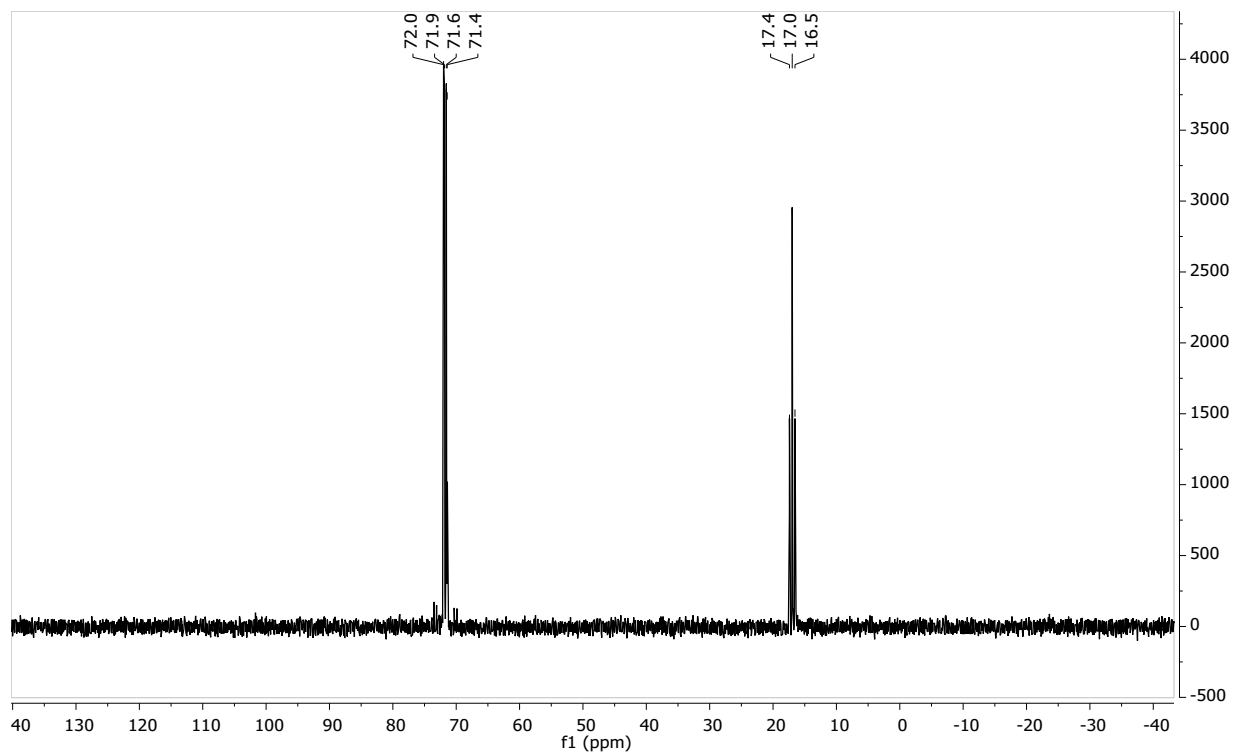

Figure S44.  $^{31}\text{P}\{^1\text{H}\}$  NMR spectrum of **11** in  $\text{CD}_3\text{CN}$ .

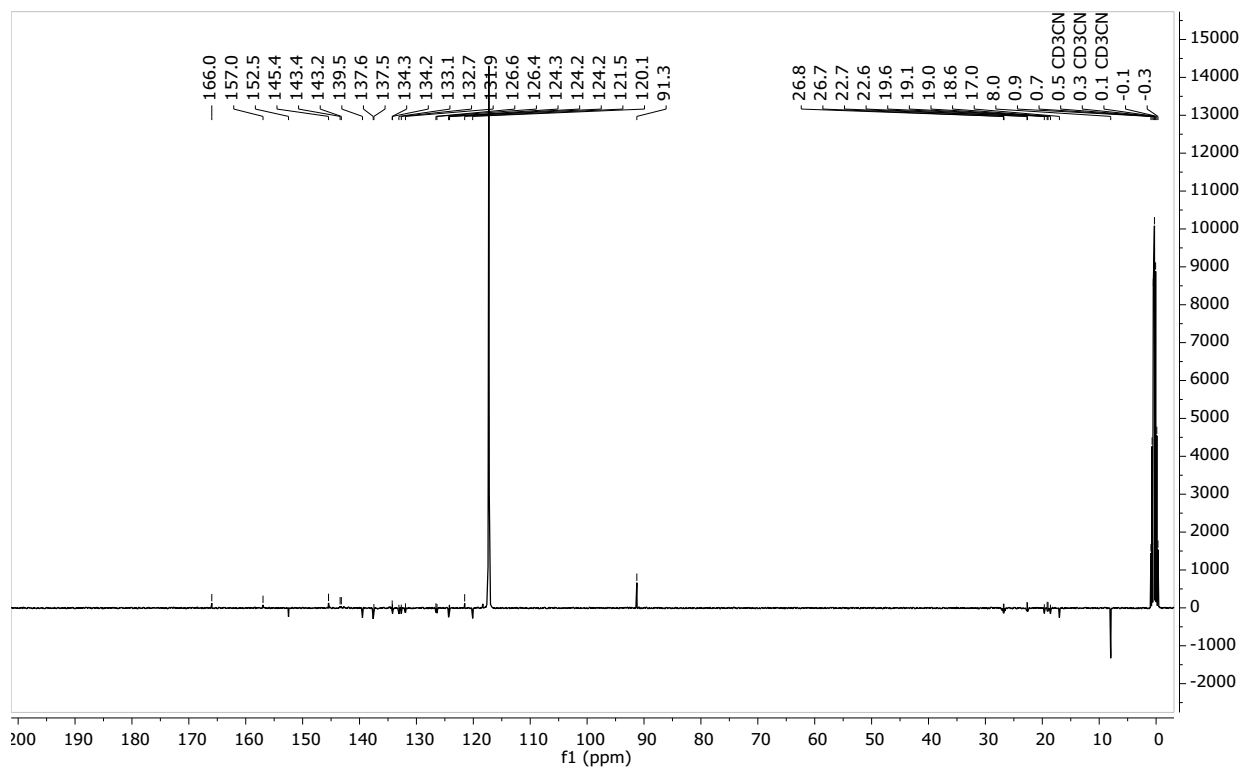

Figure S45.  $^{13}\text{C}\{^1\text{H}\}$  NMR spectrum of **11** in  $\text{CD}_3\text{CN}/\text{CD}_2\text{Cl}_2$ .

Crystallographic data

Table S0. Fundamental structure parameters

| Compound                                       | L1H                                 | 1                                        | 2                                       |
|------------------------------------------------|-------------------------------------|------------------------------------------|-----------------------------------------|
| Empirical formula                              | C <sub>17</sub> H <sub>22</sub> NPS | C <sub>28</sub> H <sub>40</sub> ClNOPrhS | C <sub>27</sub> H <sub>36</sub> ClIrNPS |
| Formula weight                                 | 303.38                              | 608.00                                   | 665.25                                  |
| Temperature [K]                                | 130(2)                              | 130(2)                                   | 130(2)                                  |
| Wavelength [pm]                                | 71.073                              | 71.073                                   | 71.073                                  |
| Crystal system                                 | Monoclinic                          | Monoclinic                               | Orthorhombic                            |
| Space group                                    | P 2 <sub>1</sub> /c                 | P 2 <sub>1</sub>                         | P na2 <sub>1</sub>                      |
| Unit cell dimensions                           |                                     |                                          |                                         |
| a [pm]                                         | 1802.95(3)                          | 773.990(10)                              | 2331.45(3)                              |
| b [pm]                                         | 843.470(10)                         | 1463.08(3)                               | 1396.26(2)                              |
| c [pm]                                         | 1120.42(2)                          | 1296.09(3)                               | 794.840(10)                             |
| α [deg]                                        | 90                                  | 90                                       | 90                                      |
| β [deg]                                        | 106.352(2)                          | 104.194(2)                               | 90                                      |
| γ [deg]                                        | 90                                  | 90                                       | 90                                      |
| Volume [nm <sup>3</sup> ]                      | 1.63494(5)                          | 1.42290(5)                               | 2.58745(6)                              |
| Z                                              | 4                                   | 2                                        | 4                                       |
| ρ <sub>(calculated)</sub> [Mg/m <sup>3</sup> ] | 1.233                               | 1.419                                    | 1.708                                   |
| μ [mm <sup>-1</sup> ]                          | 0.286                               | 0.845                                    | 5.422                                   |
| F(000)                                         | 648                                 | 632                                      | 1320                                    |
| Crystal size [mm <sup>3</sup> ]                | 0.65 · 0.61 · 0.23                  | 0.25 · 0.23 · 0.03                       | 0.43 · 0.34 · 0.29                      |
| Θ <sub>Min</sub> / Θ <sub>Max</sub> [deg]      | 2.687 / 32.395                      | 2.136 / 32.495                           | 1.700 / 32.450                          |
| Index ranges                                   | -26 ≤ h ≤ 26                        | -11 ≤ h ≤ 11                             | -33 ≤ h ≤ 33                            |
|                                                | -12 ≤ k ≤ 12                        | -21 ≤ k ≤ 21                             | -20 ≤ k ≤ 21                            |
|                                                | -16 ≤ l ≤ 16                        | -19 ≤ l ≤ 19                             | -11 ≤ l ≤ 11                            |
| Reflections collected                          | 44011                               | 19745                                    | 37668                                   |
| Indp. reflections (R <sub>int</sub> )          | 5635 (0.0156)                       | 9324 (0.0478)                            | 8190 (0.0357)                           |
| Completeness (Θ <sub>Max</sub> )               | 100.0 % (30.51)                     | 100.0 % (30.51)                          | 100.0 % (30.51)                         |
| T <sub>Max</sub> / T <sub>Min</sub>            | 1.00000 / 0.89608                   | 1.00000 / 0.95405                        | 0.450 / 0.275                           |
| Restraints / parameters                        | 0 / 269                             | 1 / 318                                  | 1 / 298                                 |
| Gof on F <sup>2</sup>                          | 1.147                               | 0.963                                    | 1.044                                   |
| R1 / wR2 (I>2σ(I))                             | 0.0322 / 0.0819                     | 0.0440 / 0.0634                          | 0.0287 / 0.0572                         |
| R1 / wR2 (all data)                            | 0.0357 / 0.0843                     | 0.0650 / 0.0693                          | 0.0338 / 0.0591                         |
| Absolute structure parameter                   | -                                   | 0.00(2)                                  | -0.023(5)                               |
| Residual electron density [e·Å <sup>-3</sup> ] | 0.491 / -0.300                      | 1.026 / -1.014                           | 1.768 / -0.907                          |
| Comments                                       | +1                                  | -                                        | -                                       |
| CCDC No                                        | 2322723                             | 2322724                                  | 2322725                                 |

Table S1. continued

| Compound                                       | 3                                            | 5                                                      | 6                                                      |
|------------------------------------------------|----------------------------------------------|--------------------------------------------------------|--------------------------------------------------------|
| Empirical formula                              | C <sub>27</sub> H <sub>36</sub> ClNPRh       | C <sub>27</sub> H <sub>36</sub> AuCl <sub>2</sub> NPRh | C <sub>27</sub> H <sub>36</sub> AuCl <sub>2</sub> IrNP |
| Formula weight                                 | 543.90                                       | 776.31                                                 | 865.60                                                 |
| Temperature [K]                                | 130(2)                                       | 130(2)                                                 | 130(2)                                                 |
| Wavelength [pm]                                | 71.073                                       | 71.073                                                 | 71.073                                                 |
| Crystal system                                 | Monoclinic                                   | Monoclinic                                             | Monoclinic                                             |
| Space group                                    | P 2 <sub>1</sub> /n                          | P 2 <sub>1</sub>                                       | P 2 <sub>1</sub>                                       |
| Unit cell dimensions                           |                                              |                                                        |                                                        |
| a [pm]                                         | 782.150(10)                                  | 769.39(2)                                              | 770.690(10)                                            |
| b [pm]                                         | 2815.60(2)                                   | 1491.64(2)                                             | 1483.63(2)                                             |
| c [pm]                                         | 1164.770(10)                                 | 1263.49(3)                                             | 1263.76(2)                                             |
| α [deg]                                        | 90                                           | 90                                                     | 90                                                     |
| β [deg]                                        | 93.1230(10)                                  | 105.388(2)                                             | 105.505(2)                                             |
| γ [deg]                                        | 90                                           | 90                                                     | 90                                                     |
| Volume [nm <sup>3</sup> ]                      | 2.56127(4)                                   | 1.39806(5)                                             | 1.39242(4)                                             |
| Z                                              | 4                                            | 2                                                      | 2                                                      |
| ρ <sub>(calculated)</sub> [Mg/m <sup>3</sup> ] | 1.410                                        | 1.844                                                  | 2.065                                                  |
| μ [mm <sup>-1</sup> ]                          | 0.848                                        | 6.095                                                  | 10.301                                                 |
| F(000)                                         | 1128                                         | 756                                                    | 820                                                    |
| Crystal size [mm <sup>3</sup> ]                | 0.24 · 0.19 · 0.13                           | 0.48 · 0.29 · 0.05                                     | 0.41 · 0.26 · 0.10                                     |
| Θ <sub>Min</sub> / Θ <sub>Max</sub> [deg]      | 1.894 / 32.015                               | 2.158 / 32.331                                         | 2.164 / 32.549                                         |
| Index ranges                                   | -11 ≤ h ≤ 11<br>-41 ≤ k ≤ 41<br>-17 ≤ l ≤ 17 | -11 ≤ h ≤ 11<br>-21 ≤ k ≤ 21<br>-18 ≤ l ≤ 18           | -11 ≤ h ≤ 11<br>-21 ≤ k ≤ 22<br>-19 ≤ l ≤ 18           |
| Reflections collected                          | 57522                                        | 21571                                                  | 18502                                                  |
| Indp. reflections (R <sub>int</sub> )          | 8446 (0.0299)                                | 9169 (0.0333)                                          | 9105 (0.0264)                                          |
| Completeness (Θ <sub>Max</sub> )               | 100.0 % (30.51)                              | 100.0 % (30.51)                                        | 100.0 % (30.51)                                        |
| T <sub>Max</sub> / T <sub>Min</sub>            | 1.00000 / 0.93328                            | 0.779 / 0.245                                          | 0.420 / 0.149                                          |
| Restraints / parameters                        | 0 / 289                                      | 1 / 307                                                | 1 / 307                                                |
| Gof on F <sup>2</sup>                          | 1.111                                        | 1.038                                                  | 1.052                                                  |
| R1 / wR2 (I > 2σ(I))                           | 0.0298 / 0.0610                              | 0.0302 / 0.0571                                        | 0.0257 / 0.0508                                        |
| R1 / wR2 (all data)                            | 0.0353 / 0.0631                              | 0.0336 / 0.0586                                        | 0.0275 / 0.0516                                        |
| Absolute structure parameter                   | -                                            | -0.027(2)                                              | -0.023(4)                                              |
| Residual electron density [e·Å <sup>-3</sup> ] | 0.903 / -0.488                               | 1.834 / -0.830                                         | 1.316 / -1.329                                         |
| Comments                                       | -                                            | † <sup>2</sup>                                         | † <sup>2</sup>                                         |
| CCDC No                                        | 2322726                                      | 2322727                                                | 2322728                                                |

Table S1. continued

| Compound                                                    | <b>8</b>                                                          | <b>9</b>                                                             | <b>10</b>                                                                         |
|-------------------------------------------------------------|-------------------------------------------------------------------|----------------------------------------------------------------------|-----------------------------------------------------------------------------------|
| Empirical formula                                           | C <sub>36</sub> H <sub>46</sub> AuCl <sub>3</sub> NP <sub>3</sub> | C <sub>48</sub> H <sub>64</sub> AuCl <sub>8</sub> NP <sub>3</sub> Rh | C <sub>49</sub> H <sub>64</sub> AuCl <sub>2</sub> IrN <sub>3</sub> P <sub>3</sub> |
| Formula weight                                              | 888.96                                                            | 1331.38                                                              | 1248.00                                                                           |
| Temperature [K]                                             | 130(2)                                                            | 130(2)                                                               | 130(2)                                                                            |
| Wavelength [pm]                                             | 71.073                                                            | 71.073                                                               | 71.073                                                                            |
| Crystal system                                              | Monoclinic                                                        | Monoclinic                                                           | Triclinic                                                                         |
| Space group                                                 | P 2 <sub>1</sub> /c                                               | P 2 <sub>1</sub> /c                                                  | P $\bar{1}$                                                                       |
| Unit cell dimensions                                        |                                                                   |                                                                      |                                                                                   |
| a [pm]                                                      | 1550.06(2)                                                        | 1453.20(2)                                                           | 1066.370(10)                                                                      |
| b [pm]                                                      | 2356.07(3)                                                        | 1262.62(2)                                                           | 1080.08(2)                                                                        |
| c [pm]                                                      | 2105.85(3)                                                        | 2977.51(3)                                                           | 2172.68(3)                                                                        |
| $\alpha$ [deg]                                              | 90                                                                | 90                                                                   | 82.6960(10)                                                                       |
| $\beta$ [deg]                                               | 105.0630(10)                                                      | 92.7690(10)                                                          | 86.8970(10)                                                                       |
| $\gamma$ [deg]                                              | 90                                                                | 90                                                                   | 83.7420(10)                                                                       |
| Volume [nm <sup>3</sup> ]                                   | 7.42642(17)                                                       | 5.45687(13)                                                          | 2.46526(6)                                                                        |
| Z                                                           | 8                                                                 | 4                                                                    | 2                                                                                 |
| $\rho$ (calculated) [Mg/m <sup>3</sup> ]                    | 1.590                                                             | 1.621                                                                | 1.681                                                                             |
| $\mu$ [mm <sup>-1</sup> ]                                   | 4.333                                                             | 3.501                                                                | 5.910                                                                             |
| F(000)                                                      | 3552                                                              | 2656                                                                 | 1228                                                                              |
| Crystal size [mm <sup>3</sup> ]                             | 0.42 · 0.31 · 0.15                                                | 0.11 · 0.09 · 0.05                                                   | 0.56 · 0.14 · 0.05                                                                |
| $\Theta_{\text{Min}} / \Theta_{\text{Max}}$ [deg]           | 1.701 / 30.495                                                    | 1.752 / 27.406°                                                      | 2.520 / 34.691                                                                    |
| Index ranges                                                | -21 ≤ h ≤ 21<br>-31 ≤ k ≤ 33<br>-29 ≤ l ≤ 28                      | -18 ≤ h ≤ 18<br>-15 ≤ k ≤ 16<br>-36 ≤ l ≤ 35                         | -16 ≤ h ≤ 16<br>-17 ≤ k ≤ 17<br>-34 ≤ l ≤ 34                                      |
| Reflections collected                                       | 80851                                                             | 39789                                                                | 72977                                                                             |
| Indp. reflections (R <sub>int</sub> )                       | 20407 (0.0569)                                                    | 11249 (0.0507)                                                       | 19938 (0.0312)                                                                    |
| Completeness ( $\Theta_{\text{Max}}$ )                      | 100.0 % (28.29)                                                   | 100.0 % (25.35)                                                      | 99.9 % (33.14)                                                                    |
| T <sub>Max</sub> / T <sub>Min</sub>                         | 0.599 / 0.324                                                     | 0.843 / 0.684                                                        | 0.754 / 0.217                                                                     |
| Restraints / parameters                                     | 0 / 816                                                           | 78 / 622                                                             | 0 / 547                                                                           |
| Gof on F <sup>2</sup>                                       | 1.059                                                             | 1.027                                                                | 1.059                                                                             |
| R1 / wR2 (I > 2 $\sigma$ (I))                               | 0.0427 / 0.0745                                                   | 0.0384, 0.0633                                                       | 0.0262 / 0.0448                                                                   |
| R1 / wR2 (all data)                                         | 0.0809 / 0.0862                                                   | 0.0614, 0.0692                                                       | 0.0361 / 0.0475                                                                   |
| Absolute structure parameter                                | -                                                                 | -                                                                    | -                                                                                 |
| Residual electron density [e <sup>-</sup> Å <sup>-3</sup> ] | 2.714 / -1.293                                                    | 0.573 / -0.872                                                       | 2.607 / -0.896                                                                    |
| Comments                                                    | † <sup>3</sup>                                                    | † <sup>4</sup>                                                       | -                                                                                 |
| CCDC No                                                     | 2322729                                                           | 2322730                                                              | 2322731                                                                           |



†<sup>1</sup>: Nitrogen atom N(1) localised with bond length and displacement parameter analysis. †<sup>2</sup>: Structures of compounds **5** and **6** are isotyp. †<sup>3</sup>: The complex molecules are most likely marginally disordered with a ratio of 0.9845(4) : 0.0155(4). This disorder is only detectable for the most electron rich atoms Au(1) and Au(2). †<sup>4</sup>: Two of the three CH<sub>2</sub>Cl<sub>2</sub> solvent molecules are disordered with a ratio of 0.806(4) : 0.194(4) (Cl(5), Cl(6), C(47)) and 0.53(1) : 0.47(1) (Cl(7), Cl(8), C(48)).

Table S1. Selected bond lengths [Å] and angles [°] of complexes **1** and **2** compared to their parent 2-phenylpyridyl complexes.

| M, R =    | Rh, H<br>Ref. <sup>30</sup> | Rh, P(S)iPr <sub>2</sub><br><b>1</b> | Ir, H<br>Ref. <sup>30</sup> | Ir, P(S)iPr <sub>2</sub><br><b>2</b> |
|-----------|-----------------------------|--------------------------------------|-----------------------------|--------------------------------------|
| M1–C9     | 2.036(1)                    | 2.017(4)                             | 2.045(2)                    | 2.032(5)                             |
| M1–Cl1    | 2.392(1)                    | 2.402(1)                             | 2.397(1)                    | 2.392(1)                             |
| M1–N1     | 2.092(1)                    | 2.095(3)                             | 2.080(2)                    | 2.087(4)                             |
| C9–M1–N1  | 78.71(5)                    | 78.7(2)                              | 77.89(9)                    | 77.7(2)                              |
| C9–M1–Cl1 | 88.34(4)                    | 86.8(1)                              | 88.64(7)                    | 85.6(2)                              |
| N1–M1–Cl1 | 87.87(3)                    | 85.54(9)                             | 86.19(6)                    | 83.0(1)                              |

Table S2. Comparison of selected bond lengths [Å] and torsion angles [°] of **5** and **6** with their precursor complexes.

| M1, R =                | Rh, S    | Rh, electron pair * | Rh, AuC  | Ir, S    | Ir, AuCl  |
|------------------------|----------|---------------------|----------|----------|-----------|
|                        | <b>1</b> | <b>3</b>            | <b>5</b> | <b>2</b> | <b>6</b>  |
| M1–C9                  | 2.017(4) | 2.020(1)            | 2.014(5) | 2.032(5) | 2.031(6)  |
| M1–Cl2                 | 2.402(1) | 2.389(4)            | 2.393(1) | 2.392(1) | 2.394(2)  |
| M1–N1                  | 2.095(3) | 2.079(1)            | 2.091(4) | 2.087(4) | 2.081(6)  |
| Cp*(cen)–<br>M1···P1–R | 15.53(6) | 59.28(3)            | 15.10(5) | 11.15(6) | -14.50(5) |

\* The geometric position of the lone pair of electrons at P1 was estimated by determining the line through P1 and a centroid of the pendant carbon atoms (C1, C4 and C7). Cen = centre of the C<sub>5</sub> ring.

Table S3. Comparison of selected intramolecular distances [Å] and torsion angles [°] of **5** and **6**, with analogous complexes from reference<sup>42</sup>.

|                  | Au/Rh     | Au/Ir     |  |  |
|------------------|-----------|-----------|-------------------------------------------------------------------------------------|-------------------------------------------------------------------------------------|
|                  | <b>5</b>  | <b>6</b>  |                                                                                     |                                                                                     |
| M1...Au1         | 6.2471(6) | 6.2344(4) | 7.278(2)                                                                            | 7.303(1)                                                                            |
| Cl1...Cl2        | 8.025(3)  | 8.047(3)  | 7.802(2)                                                                            | 7.849(1)                                                                            |
| Cl2-M1...Au1-Cl1 | 110.34(6) | 111.32(6) | 40.56(7)                                                                            | 40.52(2)                                                                            |

Table S4. Selected bond lengths [Å] and angles [°] of gold(I) complex **8** and the heterobimetallic complexes **9** and **10**.

|            | Au<br><b>8</b> | Au/Rh<br><b>9</b> | Au/Ir<br><b>10</b> |
|------------|----------------|-------------------|--------------------|
| Au1-P1     | 2.554(1)       | 2.542(1)          | 2.5164(5)          |
| Au1-P2     | 2.293(1)       | 2.312(1)          | 2.3009(6)          |
| Au1-P3     | 2.299(1)       | 2.294(1)          | 2.3155(6)          |
| Au1-Cl1    | 2.636(1)       | 2.610(1)          | 2.5806(6)          |
| M1-Cl2     | /              | 2.387(1)          | 2.3889(5)          |
| M1-N1      | /              | 2.100(4)          | 2.090(2)           |
| M1-C15     | /              | 2.022(4)          | 2.037(2)           |
| Cl1-Au1-P1 | 118.58(4)      | 114.49(4)         | 113.64(2)          |
| P1-Au1-P2  | 86.65(4)       | 85.23(4)          | 87.68(2)           |
| P1-Au1-P3  | 85.14(4)       | 87.26(4)          | 86.71(2)           |
| P2-Au1-P3  | 150.11(4)      | 142.37(4)         | 139.24(2)          |
| C15-M1-N1  | /              | 78.8(2)           | 77.97(7)           |
| C15-M1-Cl2 | /              | 86.8(2)           | 88.74(6)           |
